# Supplementary material for: Novel columnar metallomesogens based on cationic platinum(ii) complexes without long peripheral chains
Source: Royal Society of Chemistry journal article supplement (doi:10.1039/c6ra28767k), 2017-01-01
Supplement: c6ra28767k1.pdf [file c6ra28767k1.pdf]

## Supporting Information

# Novel Columnar Metallomesogens Based on Cationic Platinum(II) Complexes without Long Peripheral Chains

Hao Geng, KaiJun Luo,\* HaoMin Cheng, ShiLin Zhang, HaiLiang Ni, HaiFeng Wang, WenHao Yu\* and Quan Li\*

### Contents

|                                                                                      |     |
|--------------------------------------------------------------------------------------|-----|
| 1 General information .....                                                          | S2  |
| 2 General procedure for the synthesis of compounds and complexes.....                | S2  |
| 3 POM of PtL-2.....                                                                  | S6  |
| 4 TGA and the holding time TGA.....                                                  | S6  |
| 5 DSC of PtL-1 and Pt-2.....                                                         | S6  |
| 6 PL spectra in solid state.....                                                     | S7  |
| 7 DFT calculations.....                                                              | S8  |
| 8 <sup>1</sup> H NMR, <sup>13</sup> C NMR, <sup>19</sup> F NMR spectra and HRMS..... | S9  |
| 9 References.....                                                                    | S22 |

### **1 General information**

\* Prof. Dr. K.-J. Luo, H. Geng, H.-M. Cheng, S.-L. Zhang, H.-L. Ni, H.-F. Wang, W.-H. Yu and Prof. Q. Li  
College of Chemistry and Materials and Science, Sichuan Normal University  
E-mail: [Luo-k-j007@163.com](mailto:Luo-k-j007@163.com); [yuwenhao2010@163.com](mailto:yuwenhao2010@163.com); [liquan6688@163.com](mailto:liquan6688@163.com)

All commercially available starting materials were used directly with no further purification. The solvents were carefully dried prior to use. NMR spectra were recorded in  $\text{CDCl}_3$  and  $\text{DMSO}-d_6$  on Varian INOVA-400 MHz and 100 MHz spectrometer. Mass spectra were recorded on Waters Q-TOF Premier. UV-Vis absorption spectra were measured at room temperature on Perkin Elmer Lambda 950 spectrophotometer. The photoluminescence (PL) spectra were measured on Horiba Fluorolog-4 spectrophotometer. The lifetimes of complexes were measured on Horiba Fluorolog-4 spectrophotometer. Thermal gravity analysis (TGA) were measured on TA Discovery TGA. Differential scanning calorimetry (DSC) were performed on TA Discovery DSC. Polarized optical microscopy (POM) were measured on Zeiss AxioCam MRc5 with a hot stage (Mettler FP80HT) and controller (LinkamScientific, T95-STD). X-ray diffraction (XRD) were measured on Rigaku SmartLab ( $\text{Cu K}\alpha$ ).

## 2 General procedure for the synthesis of compounds and complexes

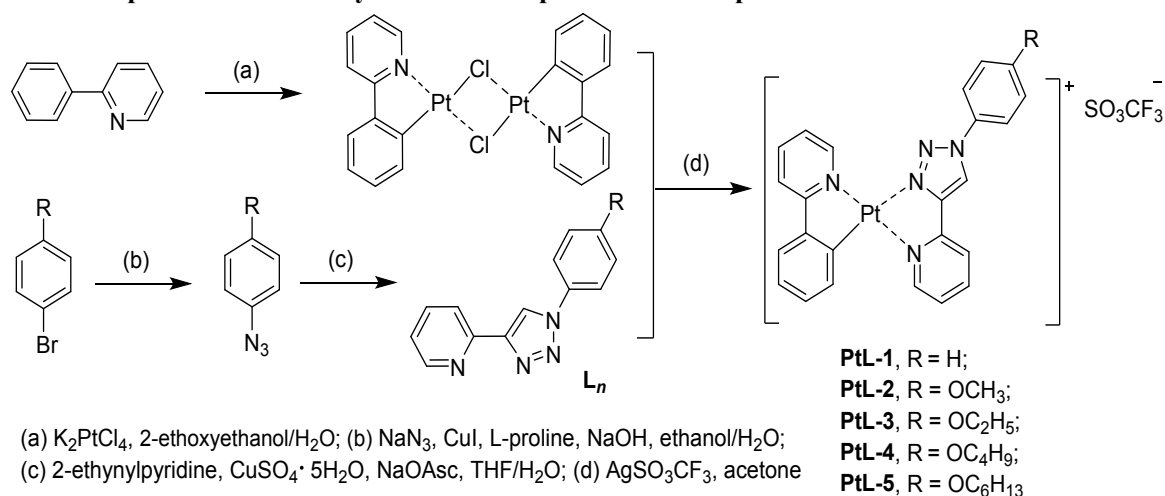

Figure S1. The synthesis routine of the complexes.

### 2.1. The synthesis of compounds

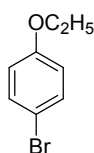

1-bromo-4-ethoxybenzene

1-bromo-4-ethoxybenzene ( $\text{L}_3$ -1): To a mixture of compound 4-bromophenol 5.16 g (0.03 mol), potassium carbonate 2.76 g (0.02 mol), bromoethane 3.78 g (0.035 mol) was added in ethanol 35 mL. The mixture was heated to 75 °C and stirred for 24 h. After cooling to room temperature, the mixture was evaporated to remove the solvent and extracted with dichloromethane and deionized water, the combined organic layer was dried with anhydrous magnesium sulfate overnight and filtered. The filtrate was evaporated to remove the solvent and the residual was purified on a silica column using petroleum ether (PE) as the eluent to give a white oily liquid 5.6 g (0.028 mol), Yield 95 %.  $^1\text{H}$  NMR (400 MHz,  $\text{CDCl}_3$ , TMS)  $\delta$ : 7.43 - 7.30 (m, 2H), 6.83 - 6.69 (m, 2H), 3.97 (m,  $J = 7.0$  Hz, 2H), 1.41 (t,  $J = 7.0$  Hz, 3H).

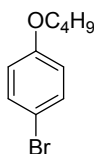

1-bromo-4-butoxybenzene

1-bromo-4-butoxybenzene ( $\text{L}_4$ -1): According to  $\text{L}_3$ -1 method, also obtained white oily liquid 5.2 g (0.023 mol), Yield 92 %.  $^1\text{H}$  NMR (400 MHz,  $\text{CDCl}_3$ , TMS)  $\delta$ : 7.36 (m,  $J = 13.0, 11.1$  Hz, 2H), 6.75 (d,  $J = 8.8$  Hz, 2H), 3.89 (t,  $J = 6.5$  Hz, 2H), 1.79 - 1.66 (m, 2H), 1.49 (m,  $J = 11.9, 6.1$  Hz, 2H), 0.99 (m,  $J = 19.2, 12.1$  Hz, 3H).

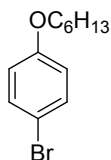

1-bromo-4-(hexyloxy)benzene

1-bromo-4-(hexyloxy)benzene (L<sub>5</sub>-1): According to L<sub>3</sub>-1 method, also obtained white oily liquid 5.7 g (0.022 mol), Yield 91 %. <sup>1</sup>H NMR (400 MHz, CDCl<sub>3</sub>, TMS)  $\delta$ : 7.32 (t,  $J$  = 11.6 Hz, 2H), 6.73 (t,  $J$  = 11.7 Hz, 2H), 3.88 (t,  $J$  = 6.6 Hz, 2H), 1.79 - 1.63 (m, 2H), 1.47 - 1.22 (m, 6H), 0.90 (s, 3H).

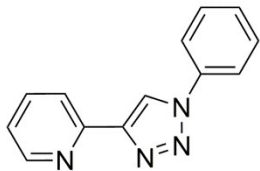

2-(1-phenyl-1H-1,2,3-triazol-4-yl)pyridine

2-(1-phenyl-1H-1,2,3-triazol-4-yl)pyridine (L<sub>1</sub>): A mixture of bromobenzene 6.28 g (0.04 mol), sodium azide 3.38 g (0.052 mol), copper (I) iodide 0.76 g (0.004 mol), L-Proline 1.38 g (0.012 mol), sodium hydroxide 0.48 g (0.012 mol), ethanol and deionized water ( $V : V = 10 : 3$ ) was heated to 90 °C

and stirred for 24 h under nitrogen atmosphere. After cooling to room temperature, the mixture was evaporated to remove the solvent and extracted with dichloromethane and deionized water, the combined organic layer was evaporated to remove the solvent and the residual was promptly purified on a neutral aluminium oxide column using PE as the eluent to give a yellow oily liquid 2.98 g (0.025 mol), Yield 62 %. The obtained compound was directly used in further reaction. To a mixture of azidobenzene 1.7 g (0.013 mol), 2-ethynylpyridine 1.5 g (0.014 mol), chalcantite 0.5 g (0.02 mol), sodium ascorbate 0.77 g (0.039 mol), was added in tetrahydrofuran and deionized water ( $V : V = 7 : 3$ ). The mixture was stirred 24 h at room temperature under nitrogen atmosphere. The solvent was evaporated to remove and extracted with dichloromethane and deionized water, the combined organic layer was dried with anhydrous magnesium sulfate overnight and filtered. The filtrate was evaporated to remove the solvent and the residual was purified on a silica column using petroleum ether (PE) and ethyl acetate (EtOAc) ( $V : V = 2 : 1$ ) as the eluent to give a yellow solid 0.5 g (2.2 mmol), Yield 17 %. <sup>1</sup>H NMR (400 MHz, CDCl<sub>3</sub>, TMS)  $\delta$ : 8.61 (d,  $J$  = 4.4 Hz, 1H), 8.53 (s, 1H), 8.25 (d,  $J$  = 7.9 Hz, 1H), 7.81 (td,  $J$  = 7.8, 1.6 Hz, 1H), 7.73 - 7.67 (m, 2H), 7.29 - 7.22 (m, 1H), 7.07 - 7.01 (m, 2H), 3.86 (d,  $J$  = 7.2 Hz, 3H).

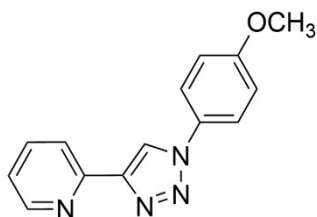

2-(1-(4-methoxyphenyl)-1H-1,2,3-triazol-4-yl)pyridine

2-(1-(4-methoxyphenyl)-1H-1,2,3-triazol-4-yl) pyridine (L<sub>2</sub>): According to L<sub>1</sub> method, obtained pale yellow solid 0.35 g (1.3 mmol), Yield 21 %. <sup>1</sup>H NMR (400 MHz, CDCl<sub>3</sub>, TMS)  $\delta$ : 8.61 (d,  $J$  = 4.4 Hz, 1H), 8.53 (s, 1H), 8.25 (d,  $J$  = 7.9 Hz, 1H), 7.81 (td,  $J$  = 7.8, 1.6 Hz, 1H), 7.73 - 7.67 (m, 2H), 7.29 - 7.22 (m, 1H), 7.07 - 7.01

(m, 2H), 3.86 (d,  $J$  = 7.2 Hz, 3H).

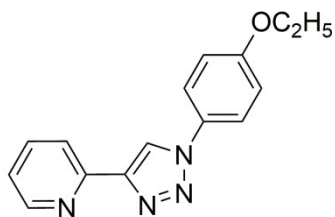

2-(1-(4-ethoxyphenyl)-1H-1,2,3-triazol-4-yl)pyridine

2-(1-(4-ethoxyphenyl)-1H-1,2,3-triazol-4-yl) pyridine (L<sub>3</sub>): According to L<sub>1</sub> method, obtained pale yellow solid 0.35 g (1.3 mmol), Yield 21 %. <sup>1</sup>H NMR (400 MHz, CDCl<sub>3</sub>, TMS)  $\delta$ : 8.61 (d,  $J$  = 4.6 Hz, 1H), 8.53 (s, 1H), 8.26 (d,  $J$  = 7.9 Hz, 1H), 7.87 - 7.77 (m, 1H), 7.74 - 7.65 (m, 2H), 7.30 - 7.23 (m, 1H), 7.04 (m,  $J$  = 7.1, 5.1 Hz, 2H),

4.09 (m,  $J$  = 7.1 Hz, 2H), 1.46 (t,  $J$  = 7.0 Hz, 3H).

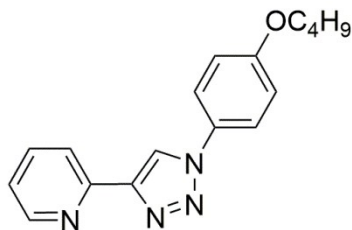

2-(1-(4-butoxyphenyl)-1H-1,2,3-triazol-4-yl)pyridine

$J = 6.1$  Hz, 2H), 4.04 - 3.97 (m, 2H), 1.80 (m,  $J = 15.0$ , 6.5 Hz, 2H), 1.56 - 1.46 (m, 2H), 0.99 (t,  $J = 7.4$  Hz, 3H).

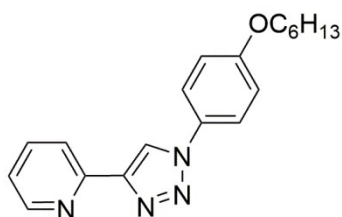

2-(1-(4-(hexyloxy)phenyl)-1H-1,2,3-triazol-4-yl)pyridine

1H), 7.86 - 7.77 (m, 1H), 7.69 (d,  $J = 9.0$  Hz, 2H), 7.31 - 7.21 (m, 1H), 7.03 (d,  $J = 9.0$  Hz, 2H), 4.04 - 3.94 (m, 2H), 1.87 - 1.75 (m, 2H), 1.54 - 1.27 (m, 6H), 0.91 (t,  $J = 6.9$  Hz, 3H).

## 2.2. The synthesis of $\mu$ -chloro-bridged dimer Platinum(II)

A mixture of 2-phenylpyridine 0.155 g (1 mmol), potassium tetrachloroplatinate(II) 0.242 g (0.58 mmol), was added in 2-ethoxyethanol and deionized water ( $V: V = 3: 1$ ). The mixture was heated to 120 °C and stirred for 24 h under nitrogen atmosphere. The solvent was removed by reduced pressure distillation. After cooling to room temperature, immediately added anhydrous ethanol and filtered, obtained yellow solid 0.52 g (0.68 mmol), Yield 68 %. The  $\mu$ -chloro-bridged dimer platinum(II) was directly used in following process.

## 2.3. The synthesis of complexes

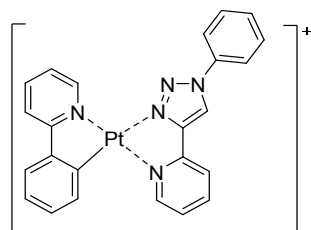

Pt-L1: The  $\mu$ -chloro-bridged dimer platinum (II) 0.156 g (0.2 mmol), L<sub>1</sub> 0.11 g (0.42 mmol) and silver trifluoromethanesulfonate 0.035 g (0.13 mmol) were dissolved in dry acetone (35 ml) under nitrogen atmosphere. The mixture was refluxed and stirred for 12 h, the bright yellow suspension was diluted with DCM, and filtered to remove the silver chloride precipitate. The filtrate was washed extensively with toluene and DCM. The resulted bright yellow solid was further washed with hot DCM, Pt-L1 was isolated as bright yellow solid 0.086 g (0.12 mmol), Yield 85 %. <sup>1</sup>H NMR (400 MHz, DMSO-*d*<sub>6</sub>, TMS)  $\delta$ : 9.91 (s, 1H), 9.86 (s, 1H), 9.45 (d,  $J = 5.8$  Hz, 1H), 9.10 (d,  $J = 6.0$  Hz, 1H), 8.89 (d,  $J = 5.7$  Hz, 1H), 8.69 (d,  $J = 5.9$  Hz, 1H), 8.44 - 8.34 (m, 2H), 8.21 (d,  $J = 6.3$  Hz, 1H), 8.12 (m,  $J = 18.1$ , 10.3 Hz, 3H), 8.07 - 7.94 (m, 8H), 7.82 - 7.69 (m, 7H), 7.69 - 7.57 (m, 2H), 7.45 - 7.36 (m, 2H), 7.21 (s, 1H), 7.14 (m,  $J = 11.6$ , 7.8 Hz, 3H), 7.06 (m,  $J = 12.8$ , 7.2 Hz, 1H). <sup>13</sup>C NMR(100 MHz, DMSO-*d*<sub>6</sub>, TMS)  $\delta$ : 166.05, 152.09, 151.02, 149.65, 148.88, 148.46, 146.24, 141.59, 140.98, 139.63, 137.78, 136.98, 135.88, 133.88, 132.66, 130.78, 130.34, 129.88, 129.27, 127.19, 126.97, 125.50, 125.34,

124.69, 124.39, 124.08, 123.22, 122.94, 122.41, 121.67, 120.91, 120.73, 120.58, 120.02. HRMS (ESI): 571.1215 [calcd for (M-CF<sub>3</sub>SO<sub>3</sub>)<sup>+</sup>: 571.1210]. <sup>19</sup>F NMR (376 MHz, DMSO-*d*<sub>6</sub>, ppm): -77.78.

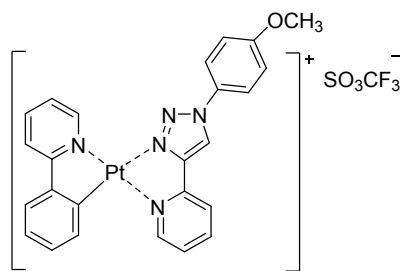

PtL-2: According to PtL-1 method, obtained yellow solid 0.16 g (0.21 mmol), Yield 87 %. <sup>1</sup>H NMR (400 MHz, DMSO-*d*<sub>6</sub>, TMS)  $\delta$ : 9.25 (s, 1H), 9.20 (s, 1H), 8.75 (d, *J* = 5.5 Hz, 1H), 8.47 (d, *J* = 5.3 Hz, 1H), 8.23 (d, *J* = 5.2 Hz, 1H), 7.98 (m, *J* = 14.4, 7.7 Hz, 3H), 7.84 (d, *J* = 8.5 Hz, 1H), 7.68 (m, *J* = 14.8, 7.2 Hz, 1H), 7.61 - 7.44 (m, 8H), 7.41 (d, *J* = 8.0 Hz, 1H), 7.29 (m, *J* = 12.8, 6.4 Hz, 2H), 7.18 - 7.04 (m, 6H), 7.00 (dd, *J* = 13.3, 7.0 Hz, 1H), 6.90 (t, *J* = 6.4 Hz, 1H), 6.80 (t, *J* = 7.2 Hz, 1H), 6.72 (m, *J* = 9.5, 4.2 Hz, 2H), 6.61 (d, *J* = 7.4 Hz, 1H), 6.55 (t, *J* = 7.3 Hz, 1H), 3.87 (s, 6H). <sup>13</sup>C NMR (100 MHz, DMSO-*d*<sub>6</sub>, TMS)  $\delta$ : 166.00, 165.64, 160.87, 160.83, 151.41, 150.52, 150.05, 149.61, 149.04, 148.53, 147.90, 146.76, 145.80, 144.17, 141.13, 140.83, 140.72, 140.47, 139.47, 136.64, 133.43, 132.09, 129.50, 129.23, 128.80, 126.66, 126.54, 125.14, 124.81, 124.35, 123.60, 123.25, 122.56, 121.94, 121.70, 119.88, 119.60, 115.65, 115.53, 56.23. HRMS (ESI): 601.1312 [calcd for (M-CF<sub>3</sub>SO<sub>3</sub>)<sup>+</sup>: 601.1316]. <sup>19</sup>F NMR (376 MHz, DMSO-*d*<sub>6</sub>, ppm): -77.78.

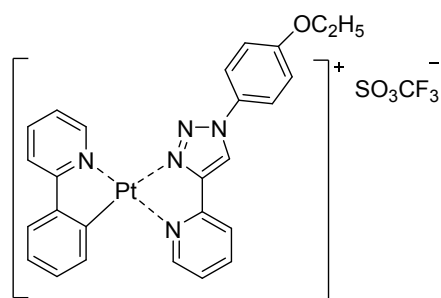

PtL-3: According to PtL-1 method, obtained orange solid 0.084 g (0.11 mmol), Yield 66.8 %. <sup>1</sup>H NMR (400 MHz, DMSO-*d*<sub>6</sub>, TMS)  $\delta$ : 9.56 (d, *J* = 14.9 Hz, 1H), 9.43 (d, *J* = 5.8 Hz, 1H), 9.20 - 9.12 (m, 1H), 8.86 (d, *J* = 5.5 Hz, 1H), 8.62 (d, *J* = 4.7 Hz, 1H), 8.24 (m, 1H), 8.17 (d, *J* = 2.1 Hz, 1H), 8.12 - 8.04 (m, 4H), 7.98 - 7.84 (m, 4H), 7.83 - 7.76 (m, 2H), 7.75 - 7.70 (m, 2H), 7.57 (d, *J* = 7.0 Hz, 1H), 7.52 - 7.41 (m, 3H), 7.40 - 7.34 (m, 1H), 7.29 - 7.17 (m, 3H), 7.17 - 6.95 (m, 7H), 4.17 (m, *J* = 6.9 Hz, 2H), 4.07 (m, *J* = 6.9 Hz, 2H), 1.42 (t, 3H), 1.33 (t, 3H). <sup>13</sup>C NMR (100 MHz, DMSO-*d*<sub>6</sub>, TMS)  $\delta$ : 165.44, 160.28, 159.06, 150.05, 149.66, 148.99, 144.90, 141.95, 140.66, 137.73, 133.89, 130.45, 130.23, 128.97, 125.34, 124.71, 124.01, 123.68, 123.22, 122.52, 122.35, 122.18, 121.55, 120.15, 119.93, 116.12, 116.00, 115.68, 64.31, 63.98, 15.02. HRMS (ESI): 615.1465 [calcd for (M-CF<sub>3</sub>SO<sub>3</sub>)<sup>+</sup>: 615.1472]. <sup>19</sup>F NMR (376 MHz, DMSO-*d*<sub>6</sub>, ppm): -77.76.

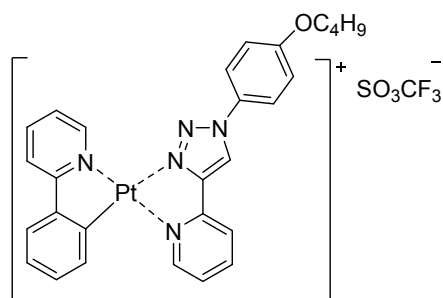

PtL-4: According to PtL-1 method, obtained red solid 0.076 g (0.09 mmol), Yield 75 %. <sup>1</sup>H NMR (400 MHz, DMSO-*d*<sub>6</sub>, TMS)  $\delta$ : 9.56 (d, *J* = 14.9 Hz, 1H), 9.43 (d, *J* = 5.8 Hz, 2H), 9.32 (d, *J* = 2.1 Hz, 1H), 9.19 (s, 1H), 9.07 (d, *J* = 1.3 Hz, 1H), 8.62 (d, *J* = 4.7 Hz, 1H), 8.33 (m, 1H), 8.18 (d, *J* = 1.1 Hz, 2H), 8.10 (s, 6H), 7.94 - 7.86 (m, 5H), 7.75 (d, *J* = 2.1 Hz, 2H), 7.47 (s, 1H), 7.37 (s, 1H), 7.25 (t, *J* = 3.0 Hz, 1H), 7.14 - 7.09 (m, 8H), 4.10 (t, *J* = 3.1 Hz, 1H), 4.02 (t, *J* = 2.2 Hz, 3H), 1.77 - 1.68 (m, 4H), 1.47 - 1.36 (m, 4H), 0.90-0.97 (m, 6H). <sup>13</sup>C NMR (100 MHz, DMSO-*d*<sub>6</sub>, TMS)  $\delta$ : 165.46, 159.24, 150.05, 149.68, 144.92, 141.98, 140.67, 137.73, 133.91, 130.47, 125.36, 124.73, 123.24, 122.80, 122.20, 121.57, 119.94, 116.21, 116.10, 115.74, 68.34, 68.06, 31.09, 19.19, 19.16, 14.19, 14.15. HRMS (ESI): 643.1792 [calcd for (M-CF<sub>3</sub>SO<sub>3</sub>)<sup>+</sup>: 643.1785]. <sup>19</sup>F NMR (376 MHz, DMSO-*d*<sub>6</sub>, ppm): -77.78.

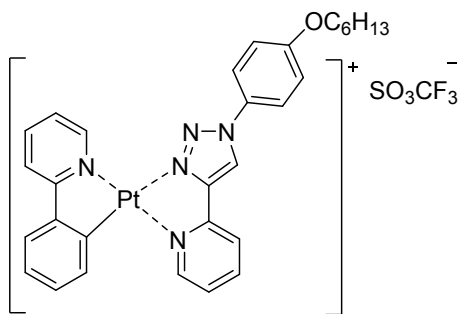

PtL-5: According to PtL-1 method, obtained red solid 0.067 g (0.081 mmol), Yiled 78 %.  $^1\text{H}$  NMR (400 MHz,  $\text{DMSO-}d_6$ , TMS)  $\delta$ : 9.79 (d,  $J = 5.8$  Hz, 1H), 9.49 (d,  $J = 23.0$  Hz, 1H), 8.95 (d,  $J = 4.4$  Hz, 1H), 8.52 (d,  $J = 7.6$  Hz, 1H), 8.49 – 8.38 (m, 3H), 8.29 - 8.14 (m, 3H), 8.09 (d,  $J = 7.3$  Hz, 1H), 7.81 (m,  $J = 8.5, 3.7$  Hz, 1H), 7.74 - 7.64 (m, 1H), 7.53 - 7.37 (m, 4H), 4.32 (dt,  $J = 14.0, 6.7$  Hz, 2H), 2.09 - 1.95 (m, 2H), 1.80 - 1.52 (m, 6H), 1.24 - 1.11 (m, 3H).  $^{13}\text{C}$  NMR (100 MHz,  $\text{DMSO-}d_6$ , TMS)  $\delta$ : 165.47, 159.25, 150.09, 150.04, 149.70, 148.42, 144.95, 142.04, 140.65, 137.77, 133.93, 132.53, 130.49, 130.23, 125.41, 124.77, 123.71, 123.28, 122.23, 121.59, 120.17, 119.98, 115.75, 68.37, 31.44, 29.00, 25.61, 22.54, 14.40. HRMS (ESI): 672.2101 [calcd for  $(\text{M-CF}_3\text{SO}_3)^+$ : 671.2098].  $^{19}\text{F}$  NMR (376 MHz,  $\text{DMSO-}d_6$ , ppm): -77.79.

### 3 POM of PtL-2

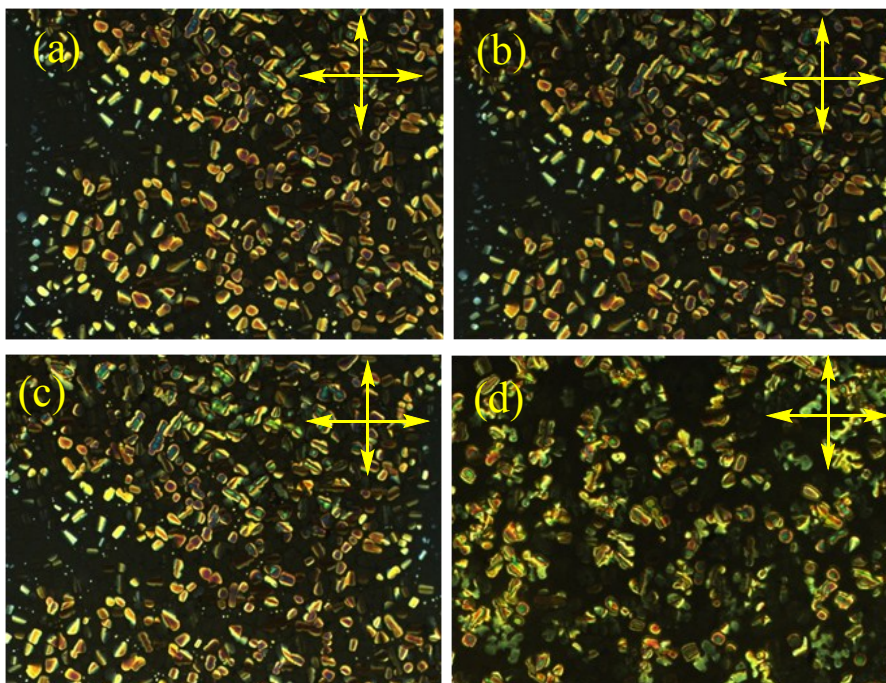

Figure S2. Optical polarizing microscopy images of PtL-2 cooling from the isotropic liquid (crossed polarizers are indicated by the yellow cross in the top right corner) at 25 (a), 87 (b), 110 (c), 236 °C (d)

### 4 TGA and the holding time TGA

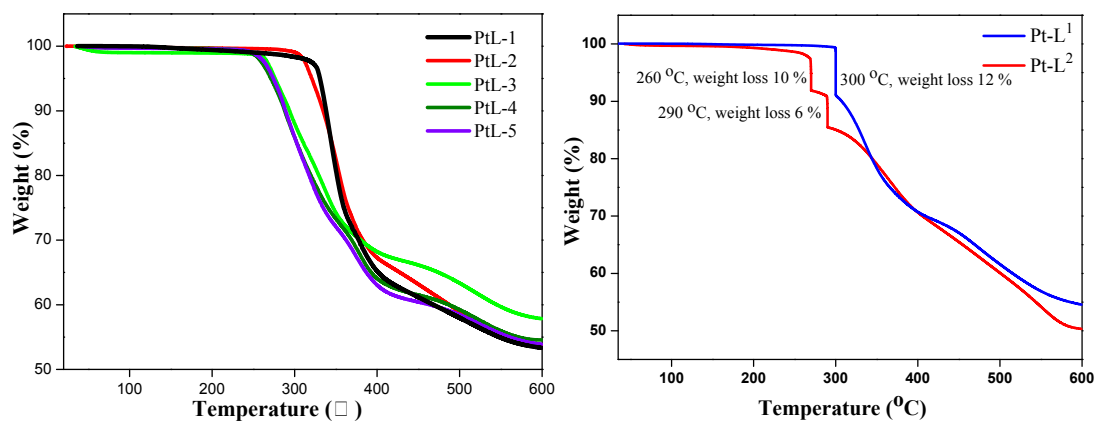

Figure S3. The TGA curves of complexes (left) and the holding time TGA analysis (right).

### 5 DSC of PtL-1 and Pt-2

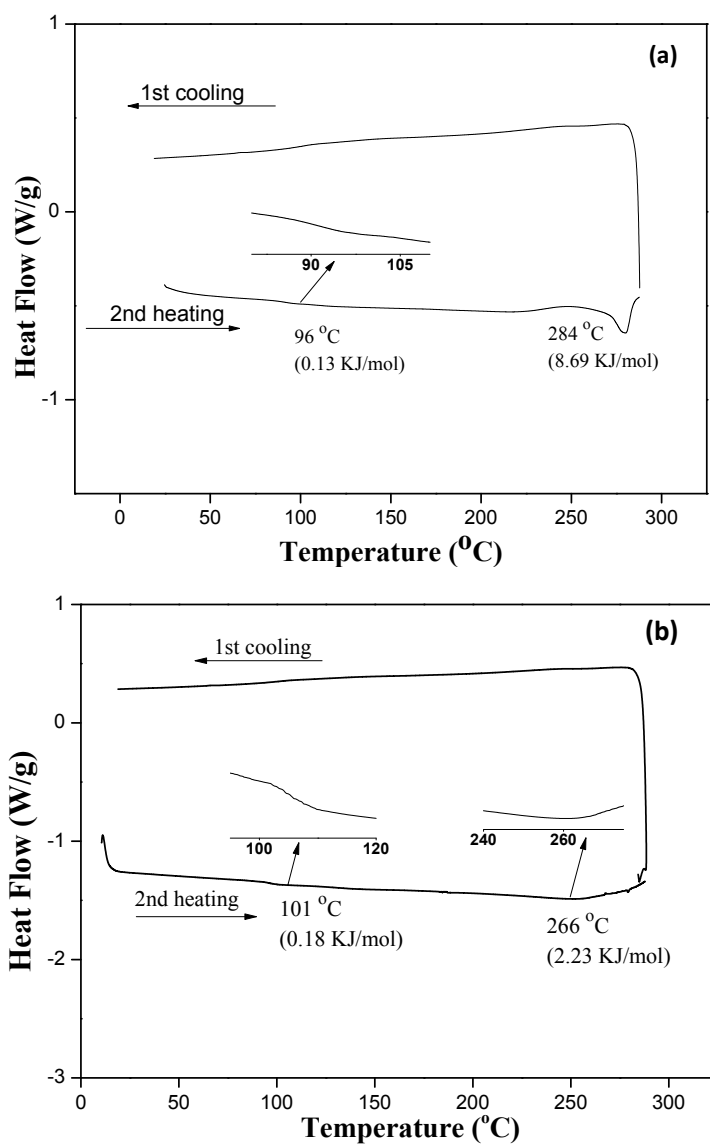

Figure S4. DSC thermograms of PtL-1(a) and PtL-2 (b)

## 6 PL spectra in solid state

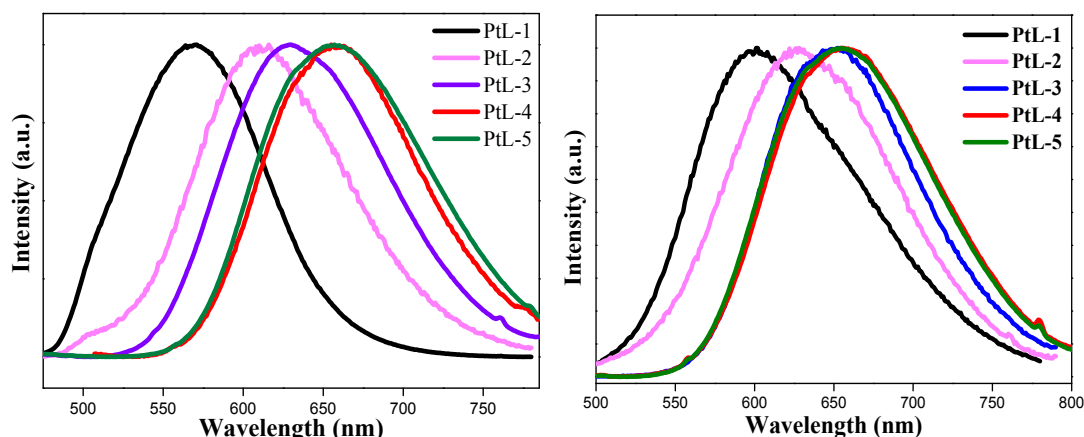

Figure S5. PL emission spectra of complexes in solid (left) and ground (right) state

Table S1. UV/Vis absorption, PL emission spectra and the quantum yields ( $\phi_{em}$ ) of complexes

| Complexes | Absorption/nm ( $\epsilon/10^4 \text{ L} \cdot \text{mol}^{-1} \cdot \text{cm}^{-1}$ ) <sup>a</sup> | Emission/nm (298 K) <sup>b</sup> | Emission/nm (77 K) <sup>c</sup> | Solid                | $\phi_{em}^d$ |
|-----------|-----------------------------------------------------------------------------------------------------|----------------------------------|---------------------------------|----------------------|---------------|
|           |                                                                                                     |                                  |                                 | emission /nm (grind) |               |
| PtL-1     | 290(0.65),382(0.15),402(0.015)                                                                      | 407(sh),432,458(sh),581          | 407,432,495,525,565             | 569(602)             | 0.19          |
| PtL-2     | 292(0.9),380(0.19),409(0.05)                                                                        | 409(sh),431,455(sh),582          | 407,432,495,525,565             | 611(628)             | 0.18          |
| PtL-3     | 292(0.91),380(0.19),409(0.05)                                                                       | 409(sh),431,455(sh),582          | 407,432,496,528,565             | 630(648)             | 0.21          |
| PtL-4     | 292(0.91),380(0.21),409(0.05)                                                                       | 406(sh),431,457(sh),583          | 407,432,495,524,562             | 655(658)             | 0.23          |
| PtL-5     | 292(0.9),380(0.19),409(0.05)                                                                        | 406(sh),431,457(sh),582          | 407,432,495,524,562             | 657(658)             | 0.22          |

<sup>a,b,c</sup>Measured in MTHF solution  $10^{-5} \text{ mol} \cdot \text{L}^{-1}$ , <sup>d</sup>Photoluminescence quantum yields.

## 7 DFT calculations

Table S2. Energy, oscillator strength and assignment of calculated transition for PtL-1 and PtL-2

|       | Excited state | Energy / eV (nm) | Oscillator strength | Assignment                               |
|-------|---------------|------------------|---------------------|------------------------------------------|
| PtL-1 | 1             | 2.92(425.3)      | 0.0124              | HOMO->LUMO(+92%)                         |
|       | 2             | 3.07(403.9)      | 0.0043              | HOMO-1->LUMO(+93%)<br>HOMO->LUMO(+5%)    |
|       | 3             | 3.44(360.6)      | 0.0215              | HOMO->LUMO+1(+84%)                       |
|       | 4             | 3.68(337.3)      | 0.0121              | HOMO-3->LUMO(+59%)<br>HOMO-2->LUMO(+28%) |
|       | 5             | 4.04(307.0)      | 0.0326              | HOMO-5->LUMO(+92%)                       |



|       |   |             |        |                                            |
|-------|---|-------------|--------|--------------------------------------------|
|       | 1 | 2.97(417.2) | 0.0267 | HOMO->LUMO(+96%)                           |
|       | 2 | 3.18(390.1) | 0.009  | HOMO-2->LUMO(+92%)<br>HOMO-1->LUMO(+6%)    |
| PtL-2 | 3 | 3.44(360.7) | 0.0961 | HOMO-1->LUMO(+75%)<br>HOMO-4->LUMO(+10%)   |
|       | 4 | 3.71(334.4) | 0.0029 | HOMO-2->LUMO+1(+85%)<br>HOMO-1>LUMO+1(+6%) |
|       | 5 | 4.03(307.8) | 0.0077 | HOMO->LUMO+2(+81%)                         |

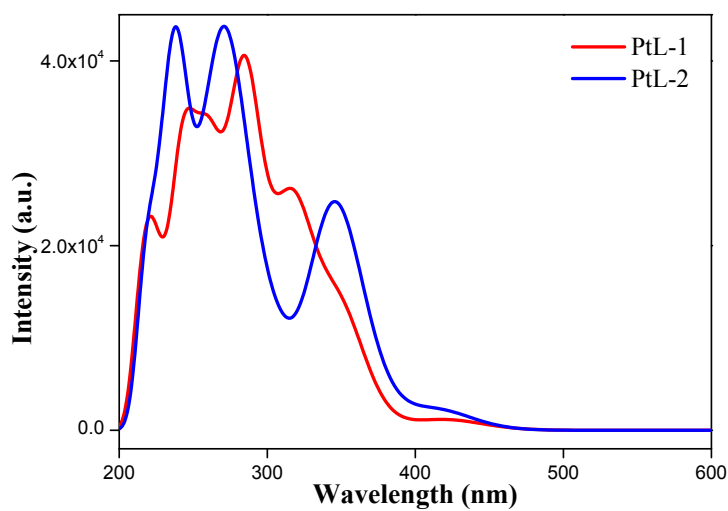

Figure S6. The theory UV-Vis absorption spectra

## 8 <sup>1</sup>H NMR, <sup>13</sup>C NMR, <sup>19</sup>F NMR and HRMS

1-bromo-4-ethoxybenzene (L<sub>3</sub>-1)

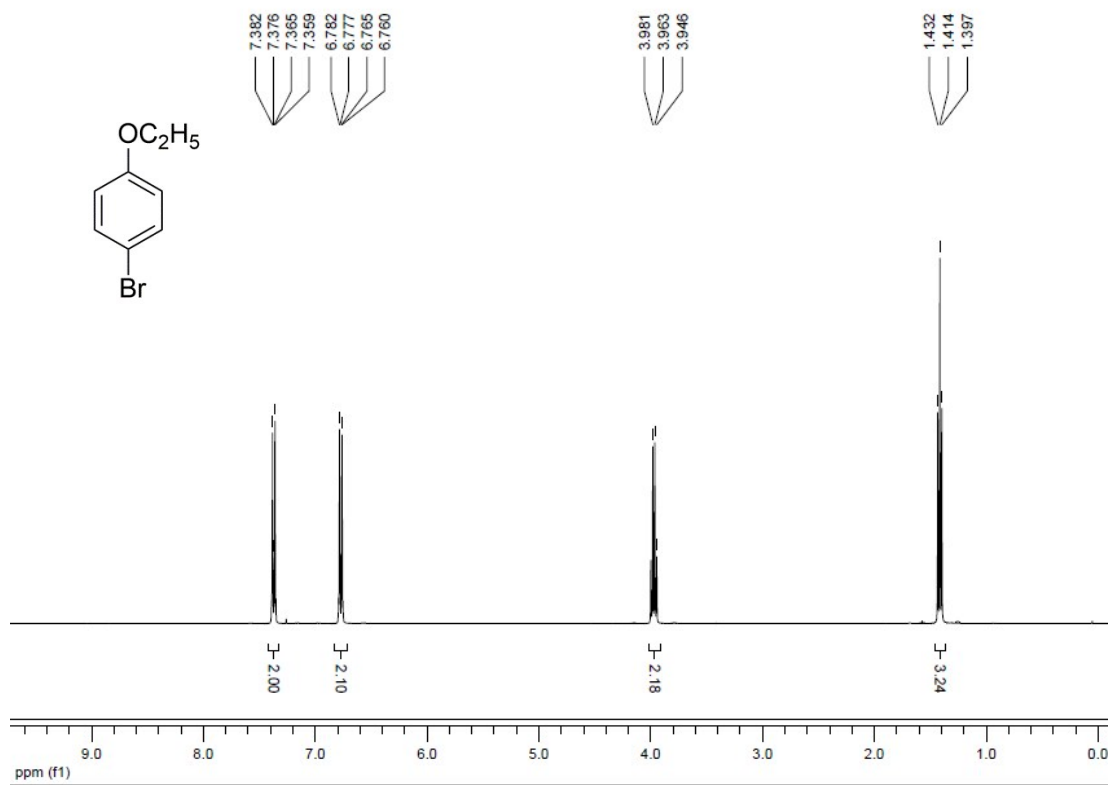

1-bromo-4-butoxybenzene (L<sub>4</sub>-1)

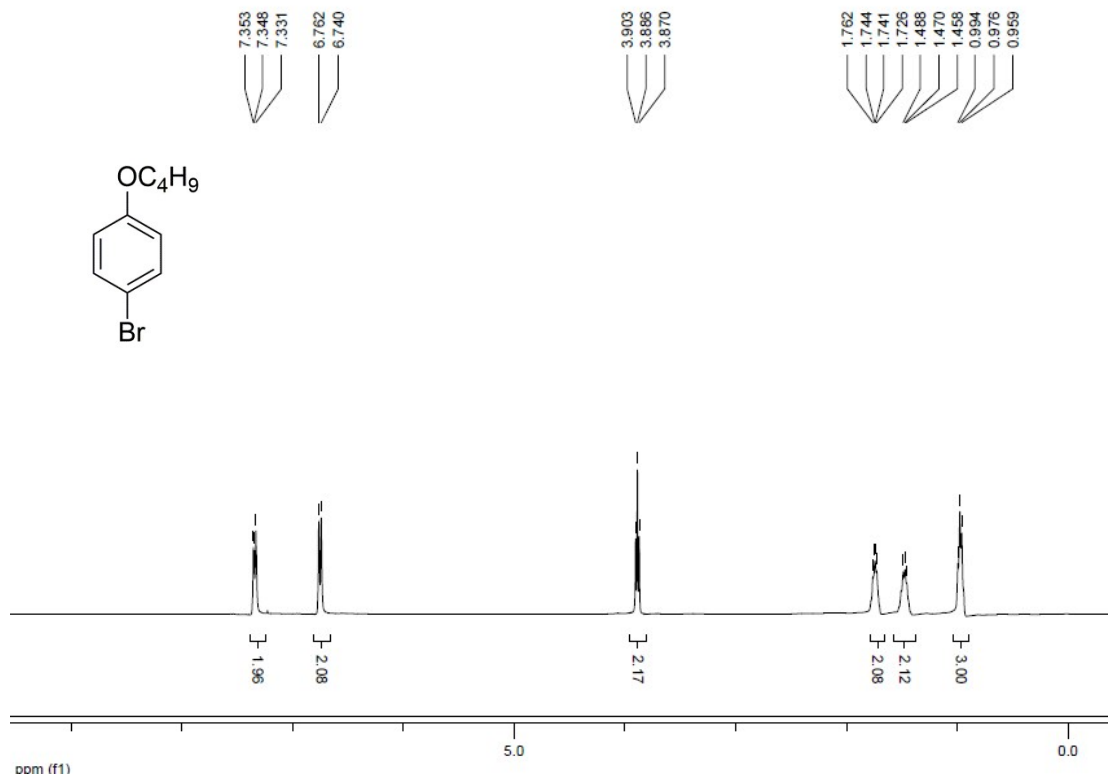

1-bromo-4-(hexyloxy)benzene (L<sub>5</sub>-1)

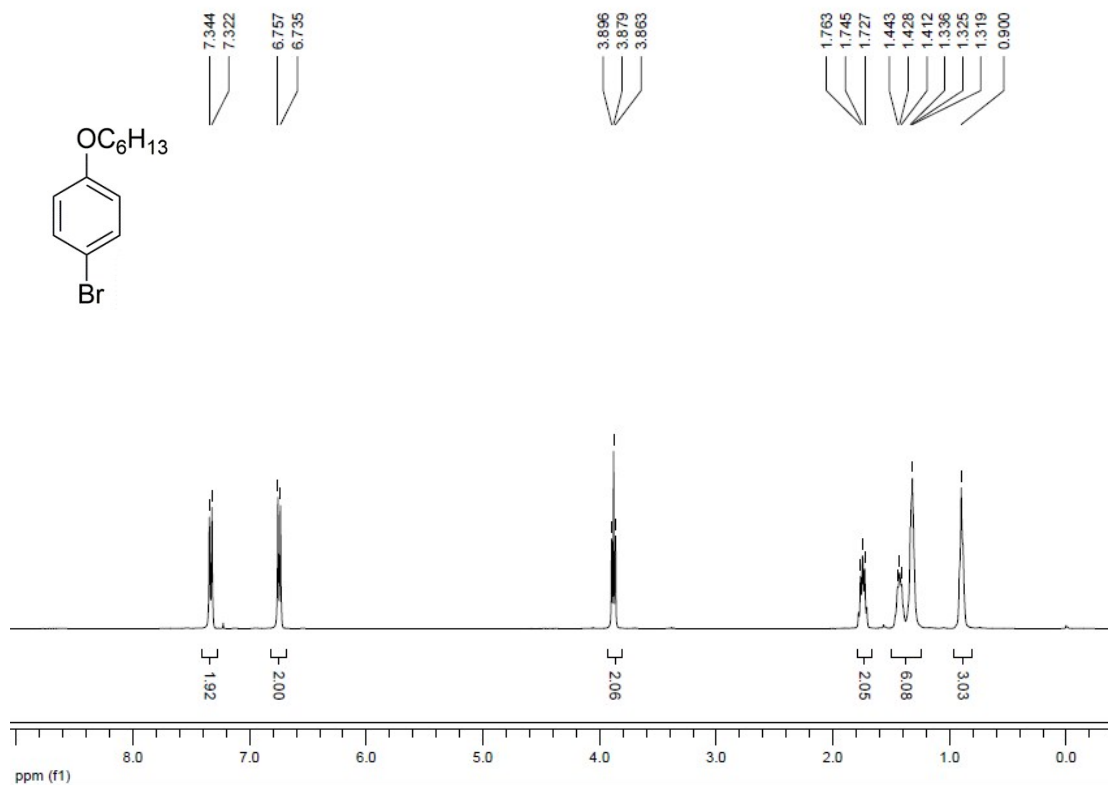

2-(1-phenyl-1H-1,2,3-triazol-4-yl)pyridine (L<sub>1</sub>)

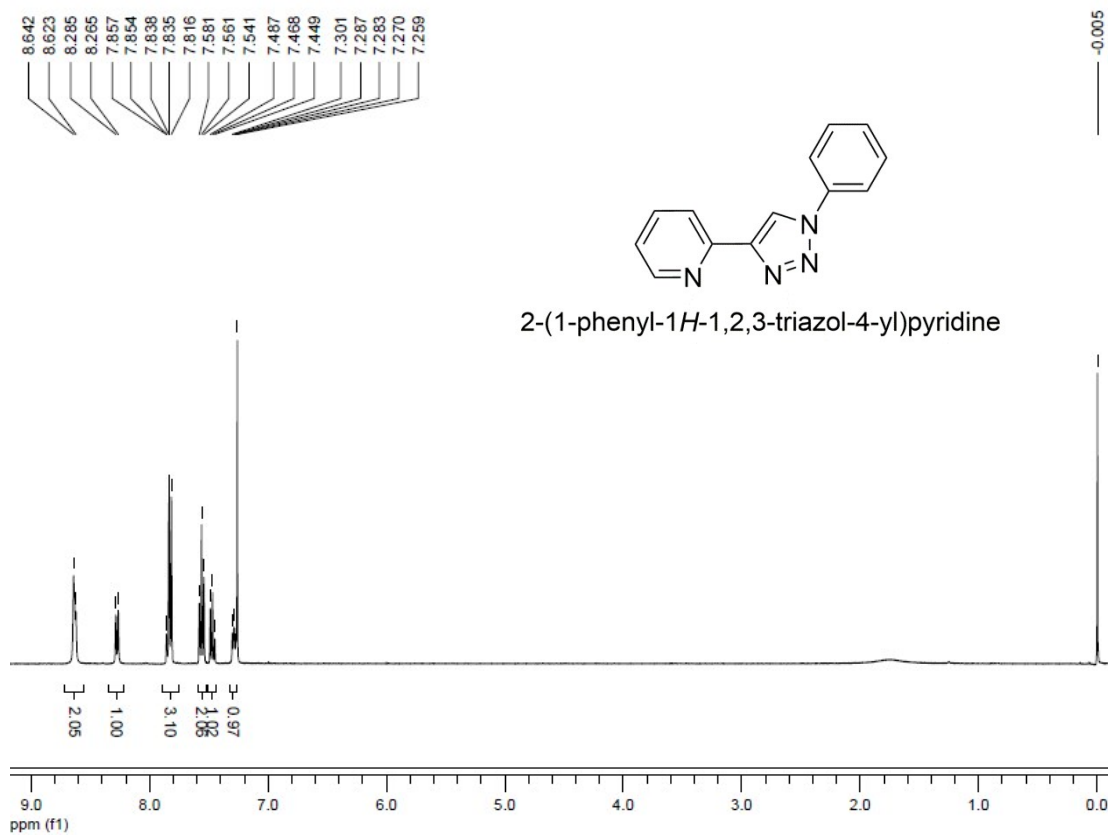

2-(1-(4-methoxyphenyl)-1H-1,2,3-triazol-4-yl)pyridine (L<sub>2</sub>)

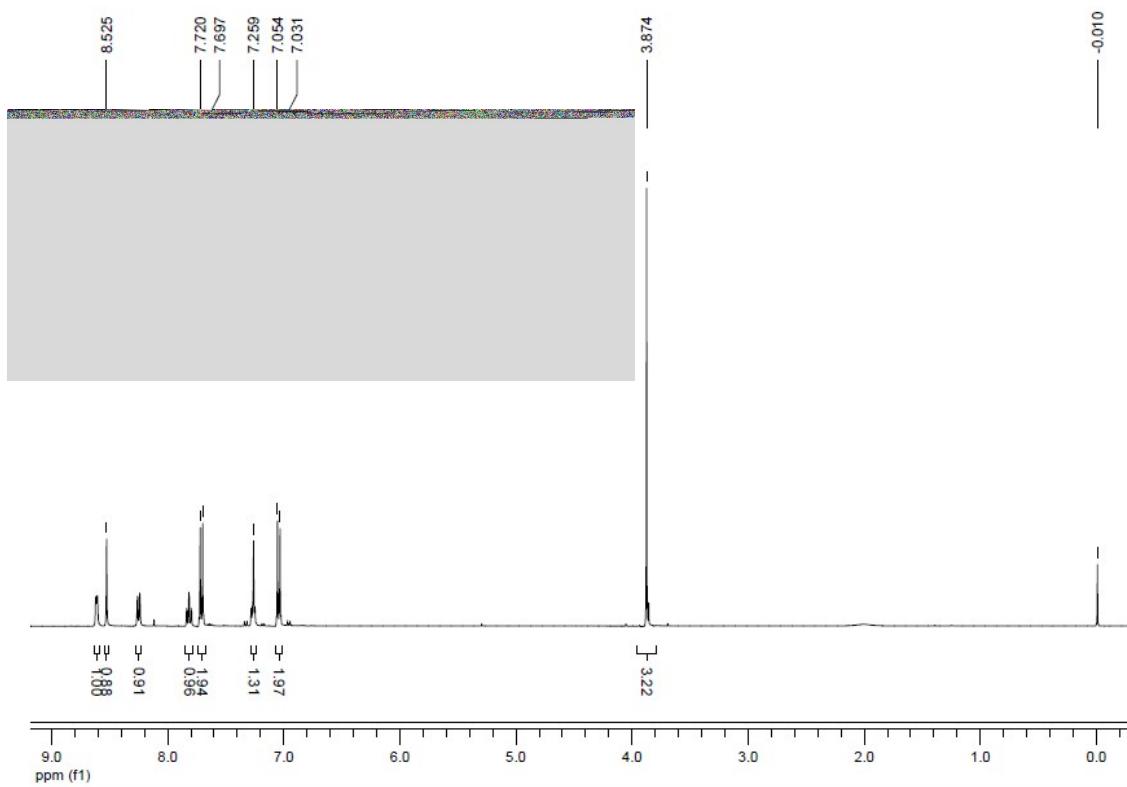

2-(1-(4-ethoxyphenyl)-1H-1,2,3-triazol-4-yl)pyridine (L<sub>3</sub>)

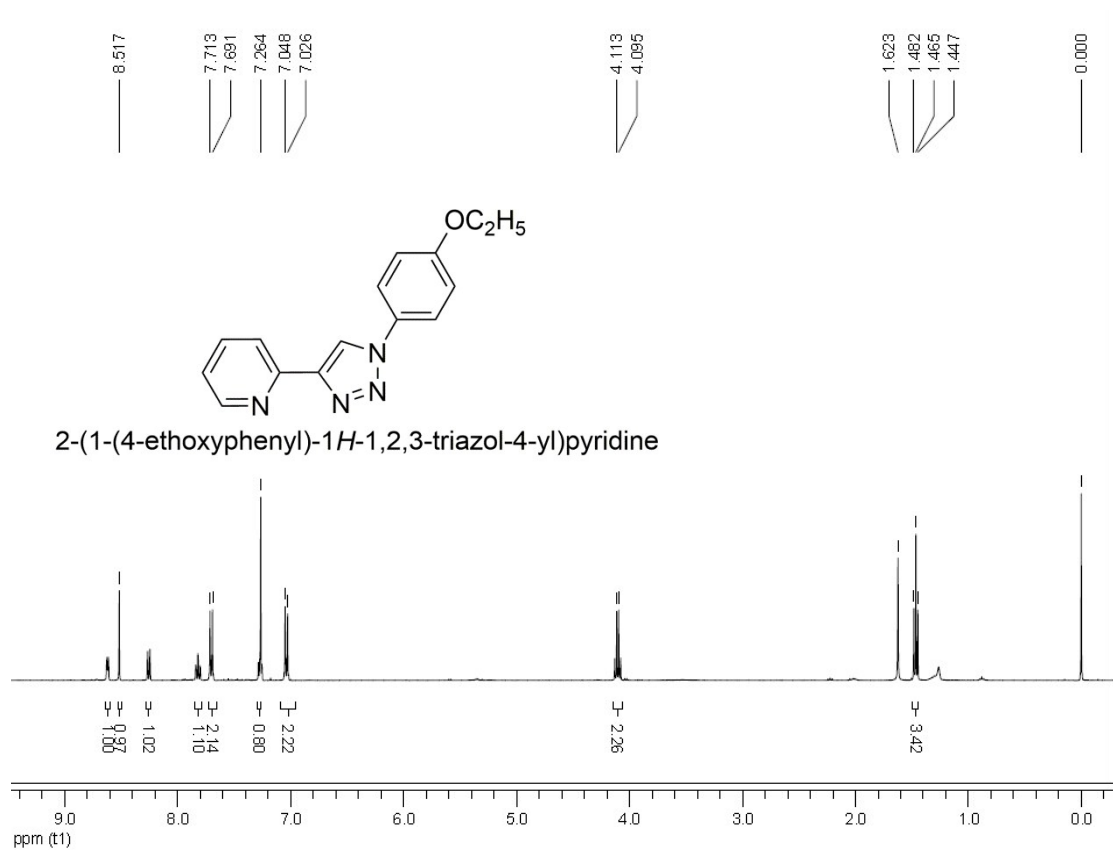

2-(1-(4-butoxyphenyl)-1H-1,2,3-triazol-4-yl)pyridine (L<sub>4</sub>)

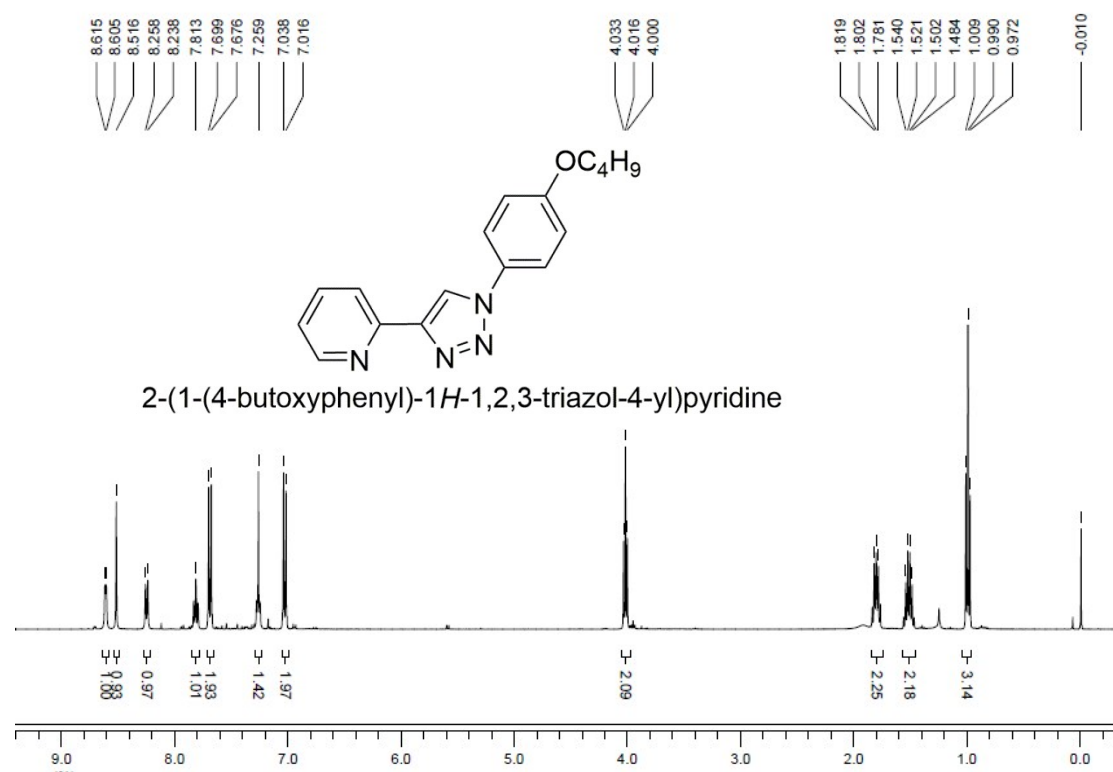

2-(1-(4-(hexyloxy)phenyl)-1H-1,2,3-triazol-4-yl)pyridine (L<sub>5</sub>)

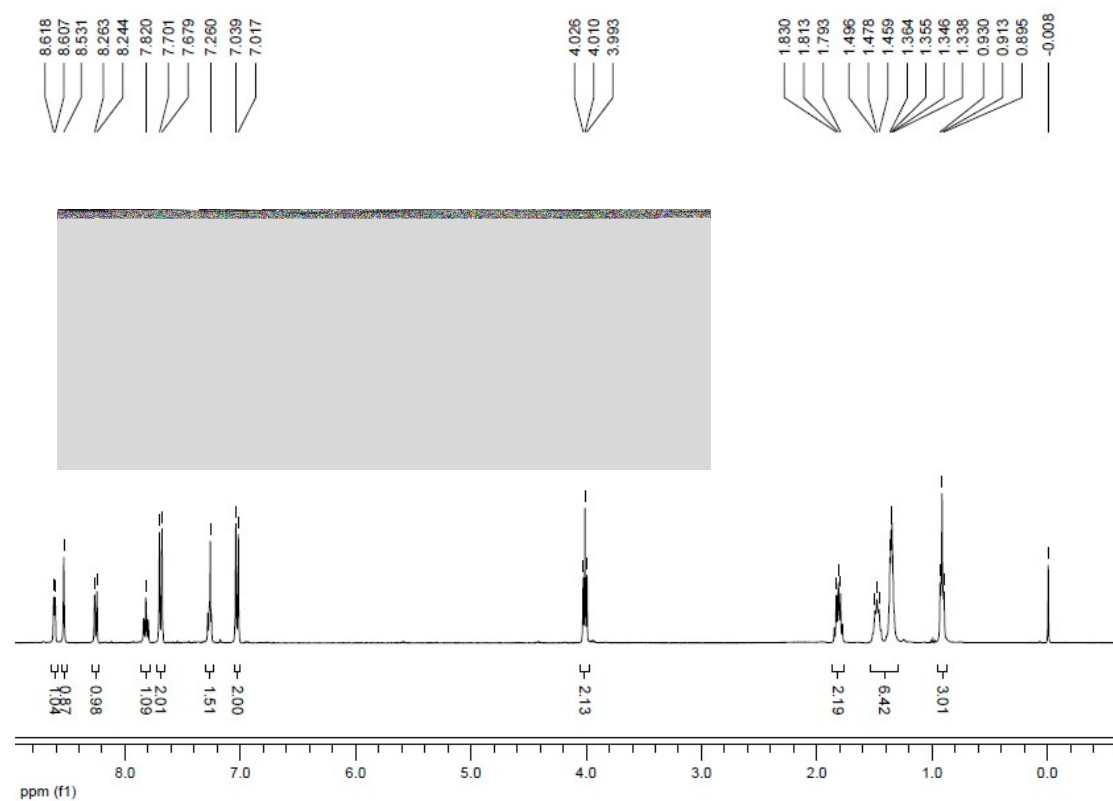

PtL-1:  $^1\text{H}$  NMR (400 MHz,  $\text{DMSO-}d_6$ , TMS)

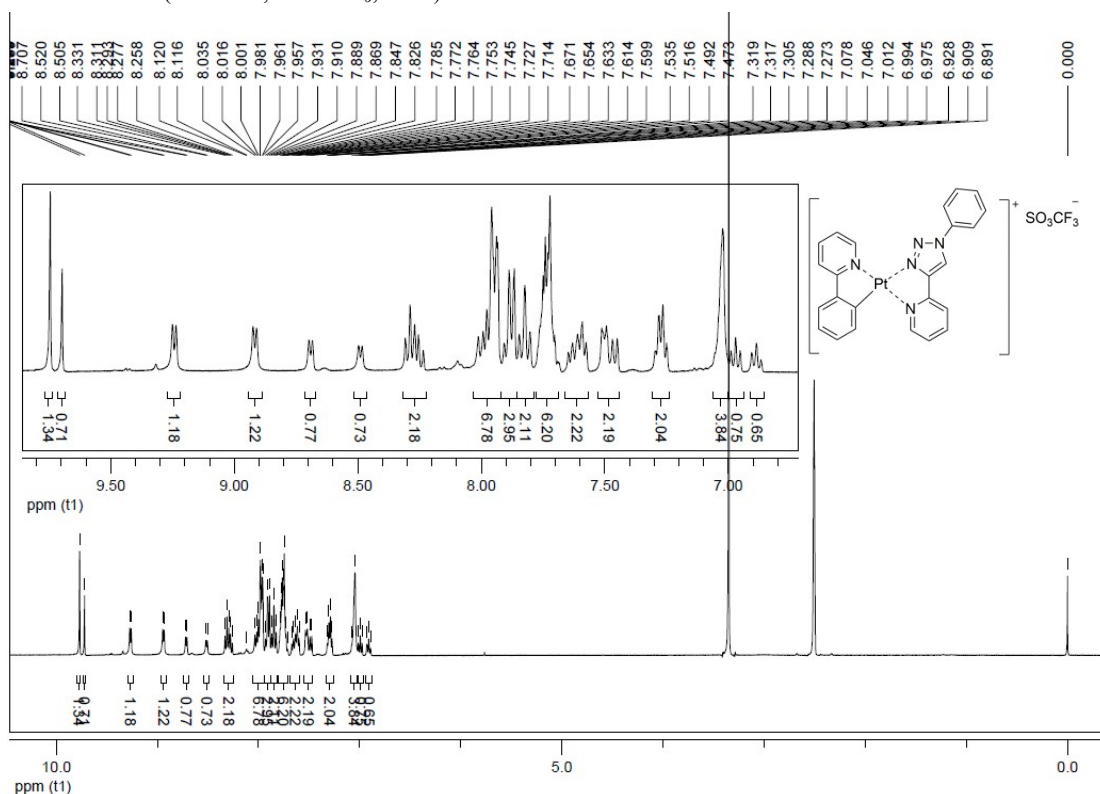

PtL-1:  $^{13}\text{C}$  NMR (101 MHz,  $\text{DMSO-}d_6$ , TMS)

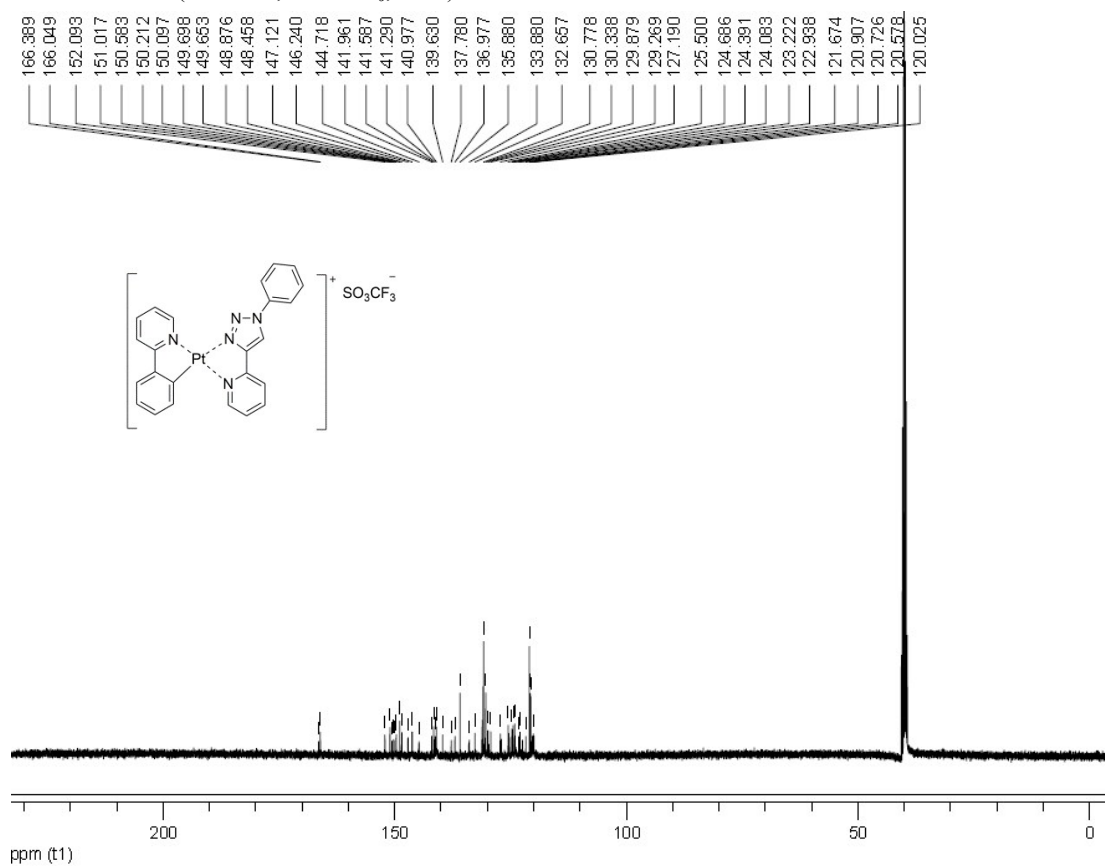



PtL-2:  $^{13}\text{C}$  NMR (101 MHz,  $\text{DMSO-}d_6$ , TMS)

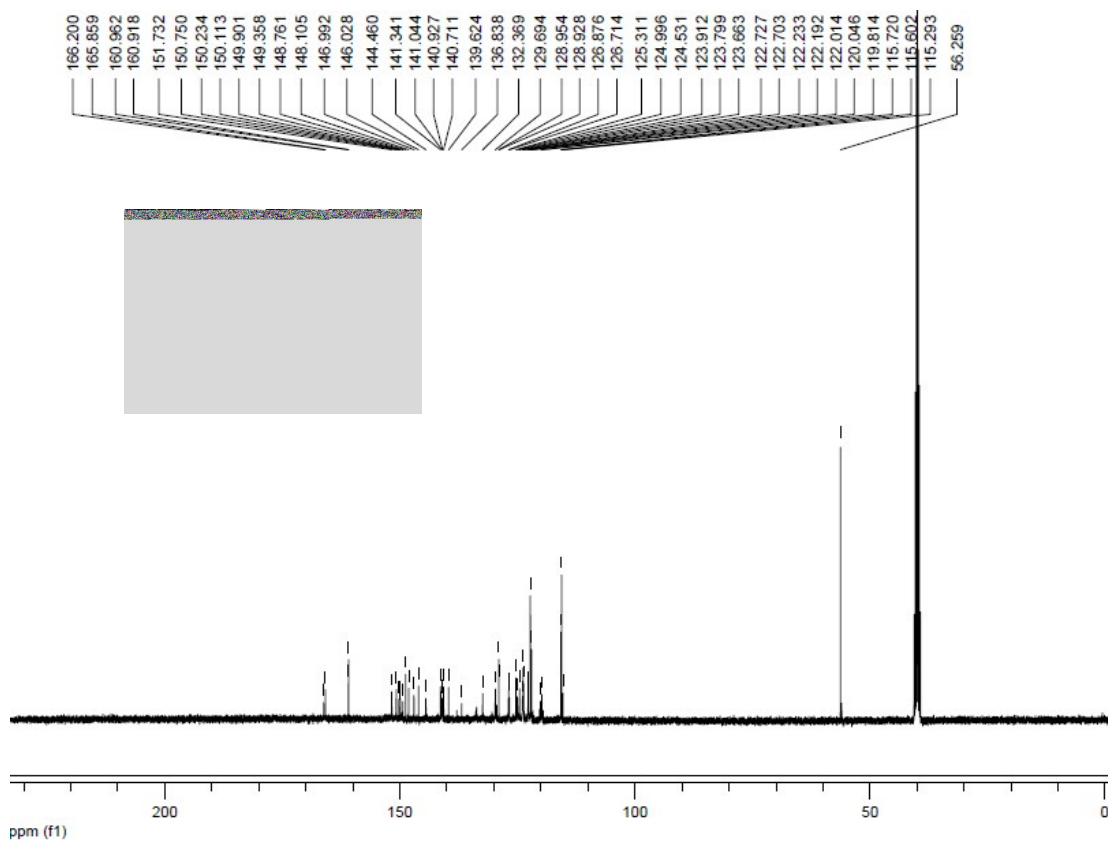

PtL-2:  $^{19}\text{F}$  NMR (376 MHz,  $\text{DMSO-}d_6$ , ppm): -77.780

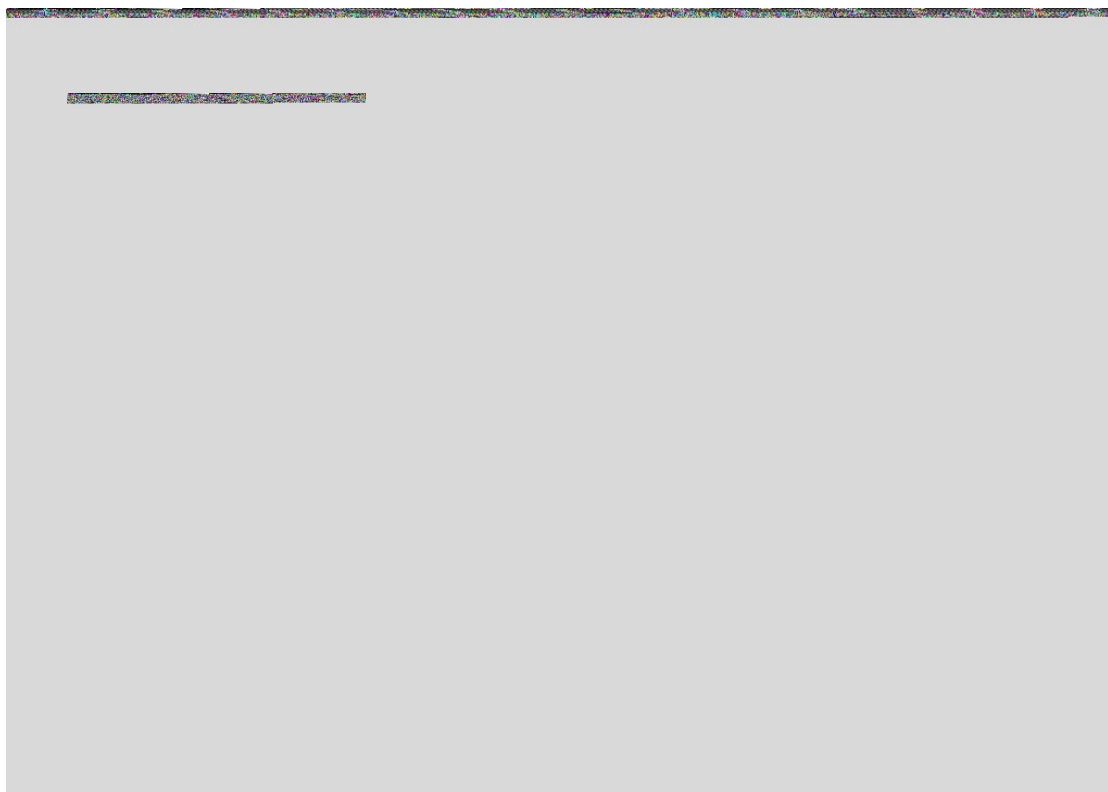



PtL-3: <sup>1</sup>H NMR (400 MHz, DMSO-*d*<sub>6</sub>, TMS)

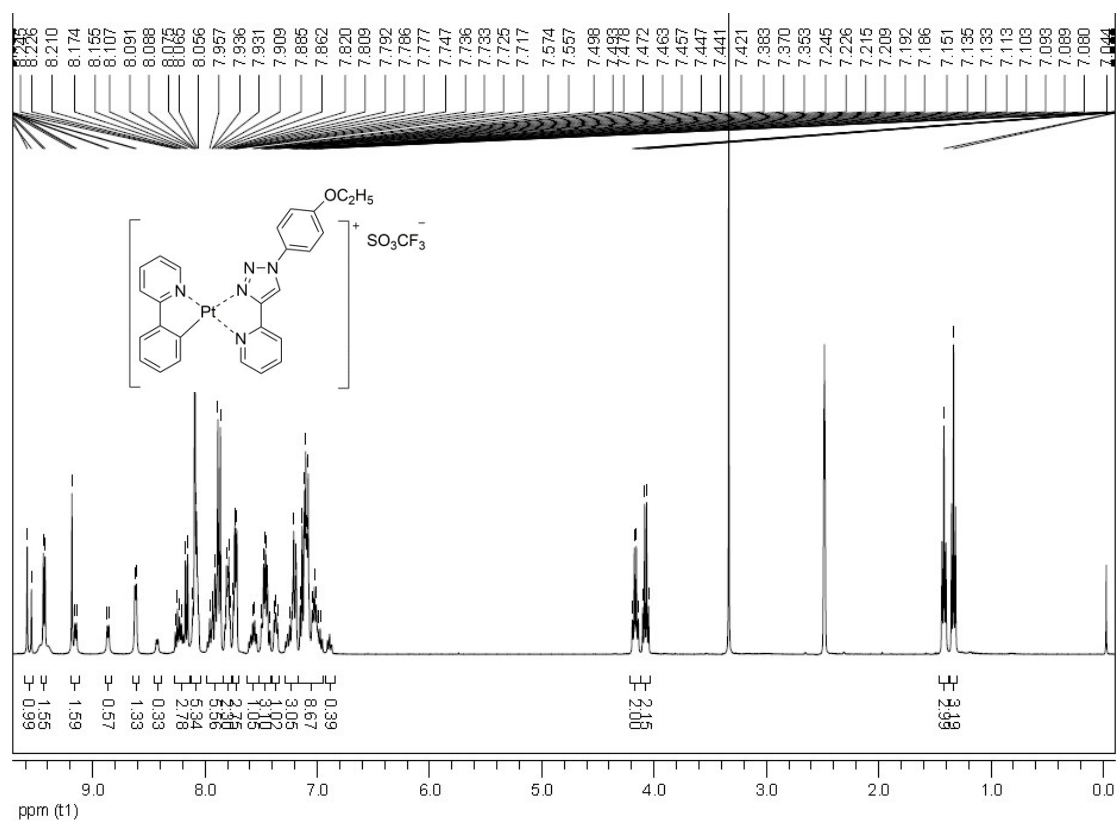

PtL-3: <sup>13</sup>C NMR (101 MHz, DMSO-*d*<sub>6</sub>, TMS)

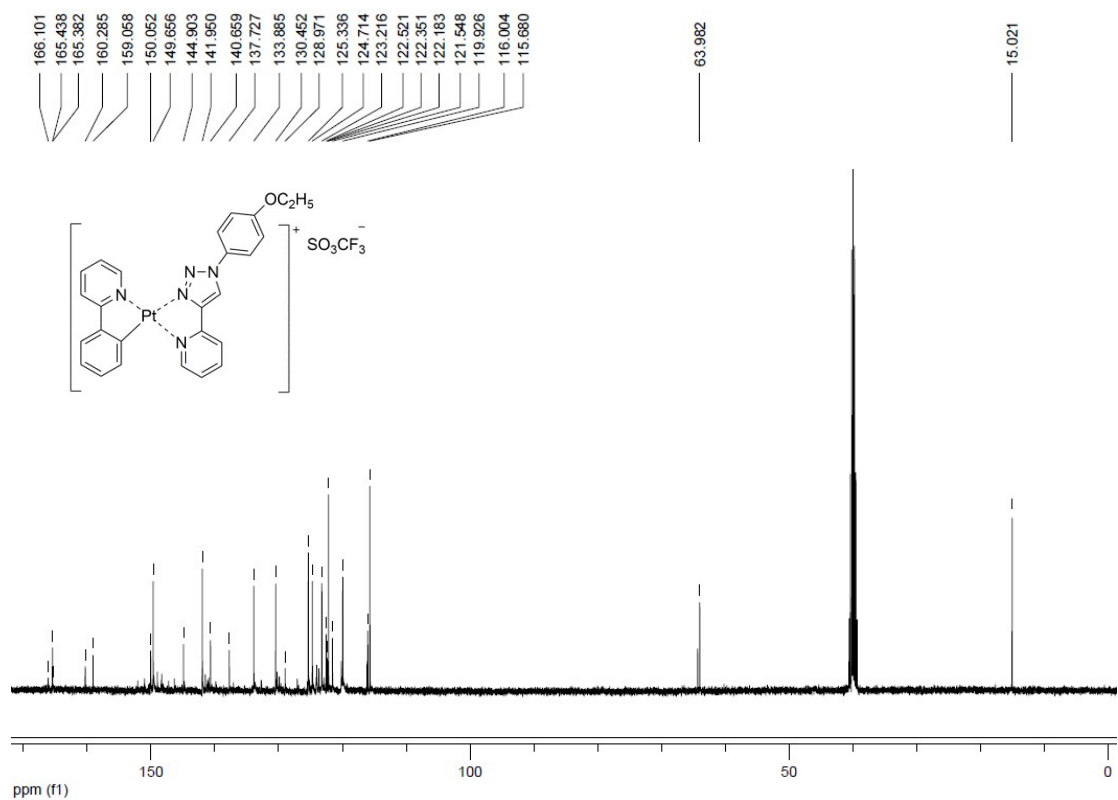

PtL-3:  $^{19}\text{F}$  NMR (376 MHz,  $\text{DMSO-}d_6$ , ppm): -77.766

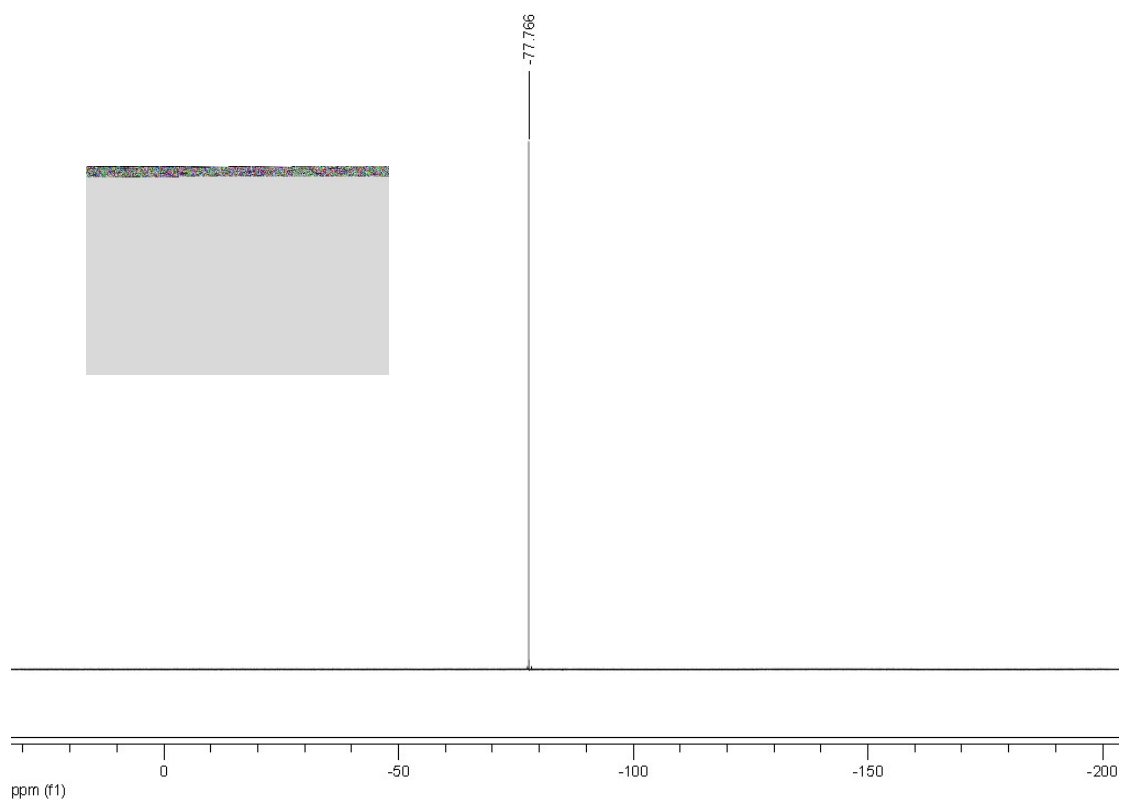

PtL-4:  $^1\text{H}$  NMR (400 MHz,  $\text{DMSO-}d_6$ , TMS)

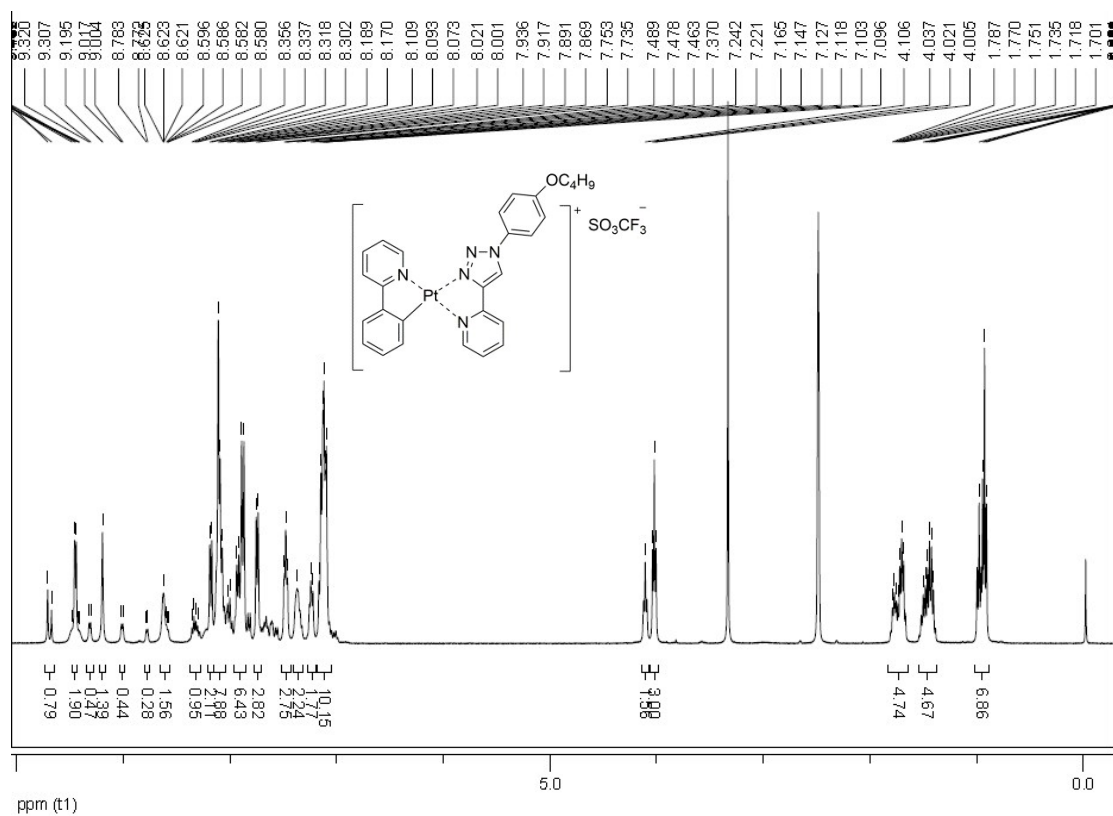

PtL-4:  $^{13}\text{C}$  NMR (101 MHz,  $\text{DMSO-}d_6$ , TMS)

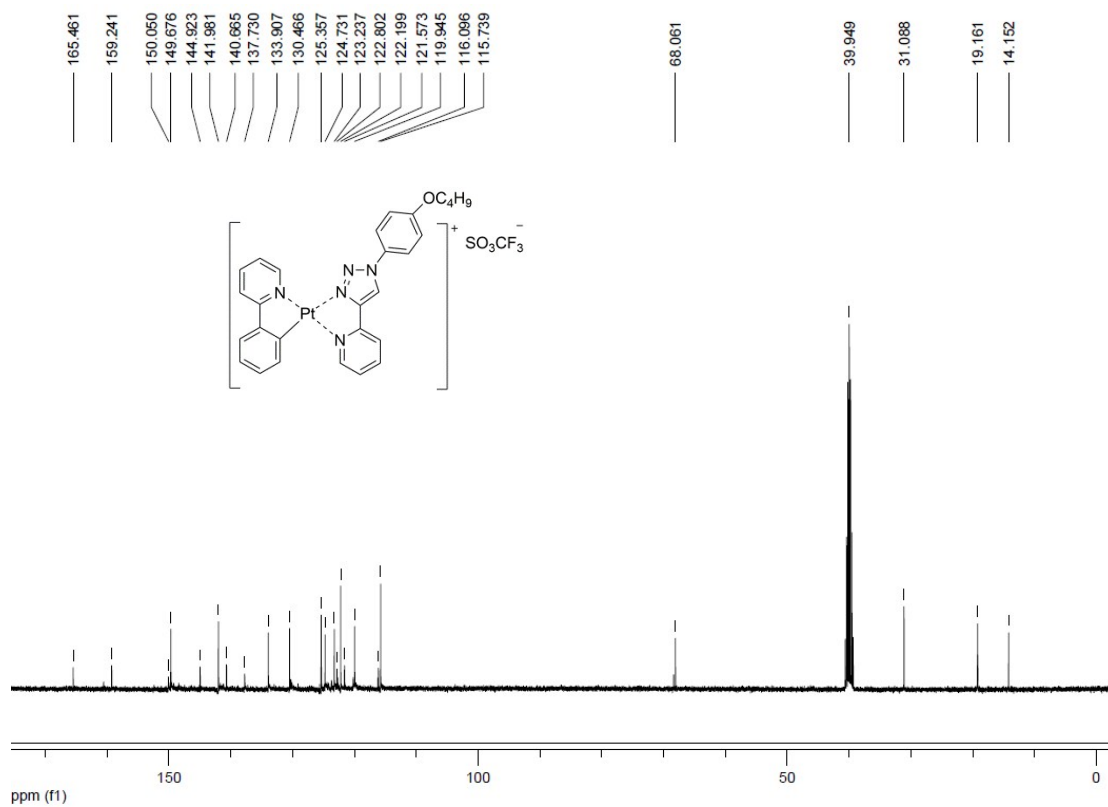

PtL-4:  $^{19}\text{F}$  NMR (376 MHz,  $\text{DMSO-}d_6$ , ppm): -77.783

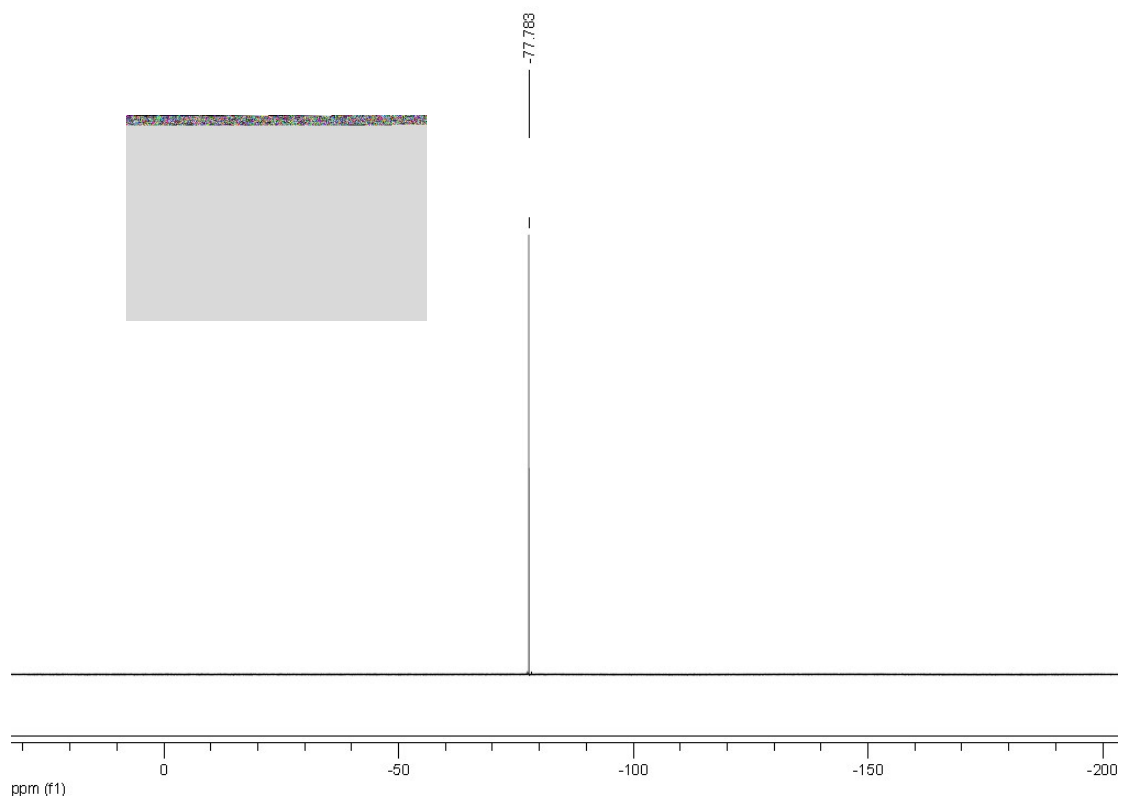

PtL-5: <sup>1</sup>H NMR (400 MHz, DMSO-*d*<sub>6</sub>, TMS)

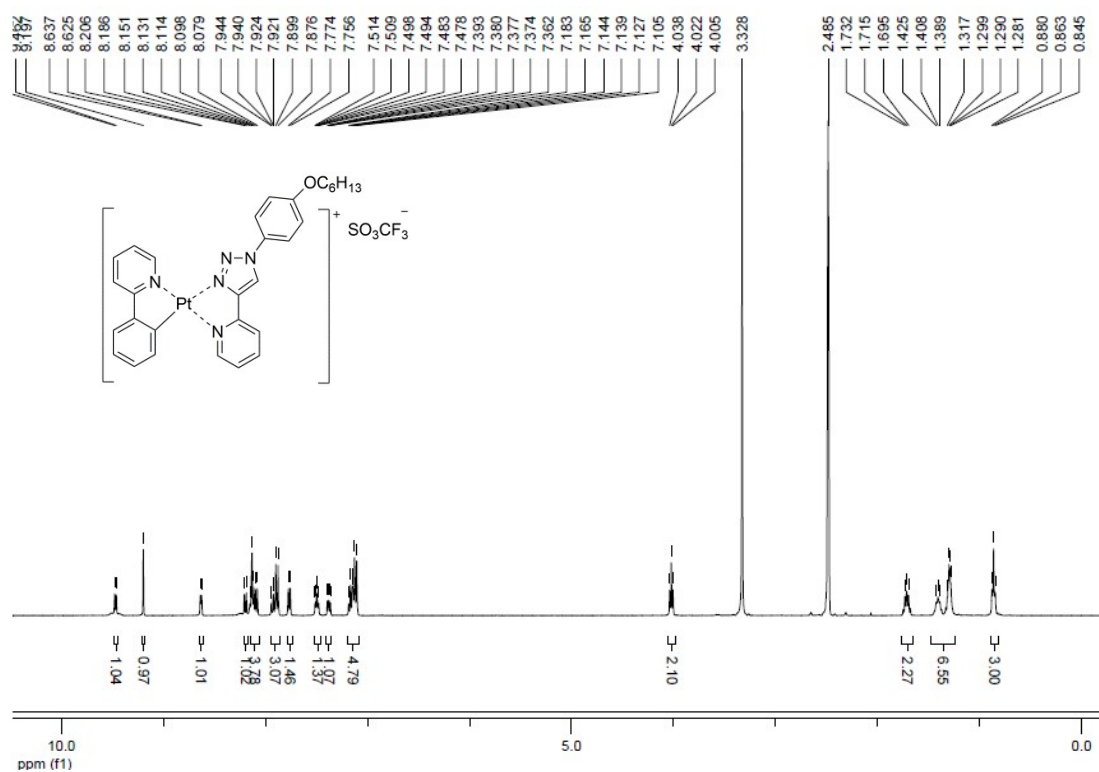

PtL-5: <sup>13</sup>C NMR (101 MHz, DMSO-*d*<sub>6</sub>, TMS)

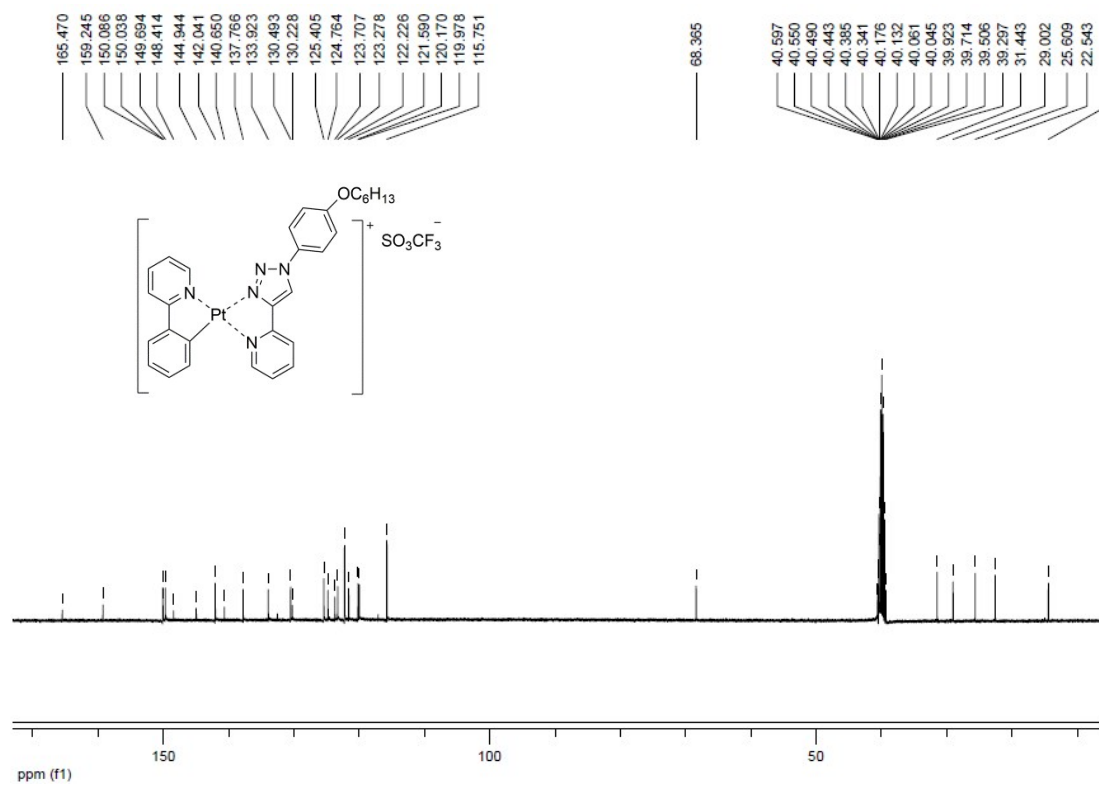

PtL-5:  $^{19}\text{F}$  NMR (376 MHz,  $\text{DMSO-}d_6$ , ppm): -77.793.

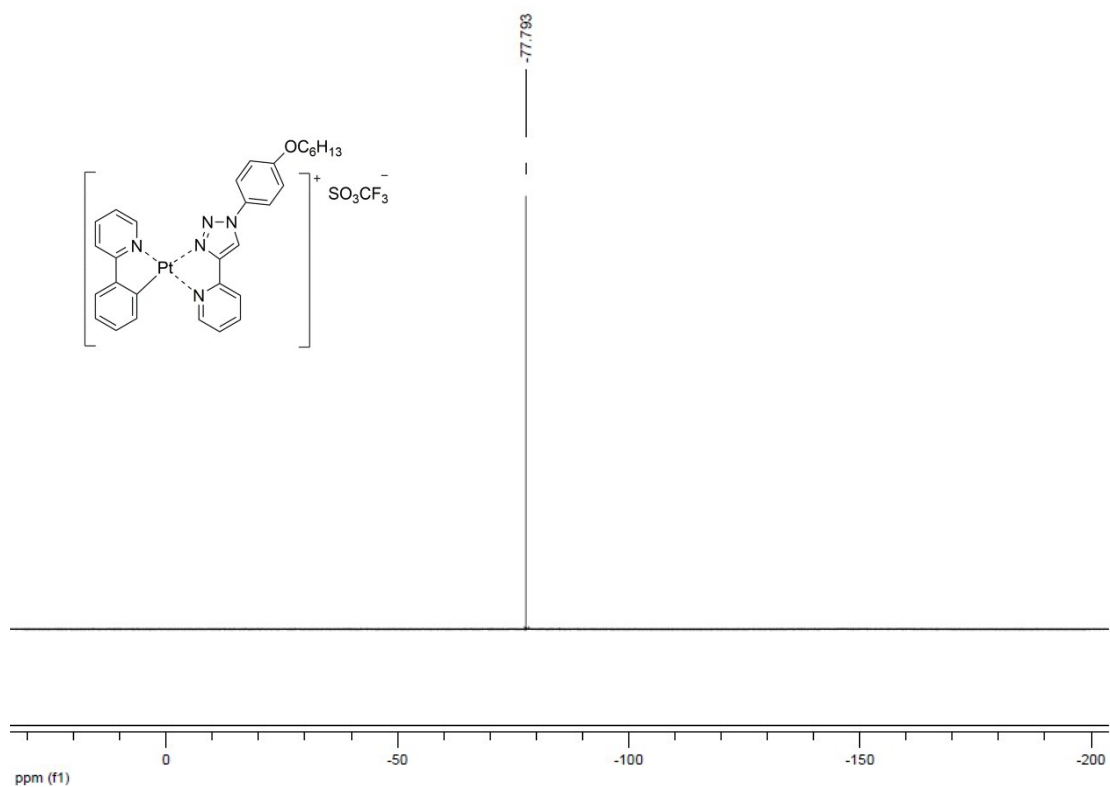

PtL-1: HRMS (ESI): 571.1215 [calcd for  $(\text{M}-\text{CF}_3\text{SO}_3)^+$ : 571.1210].

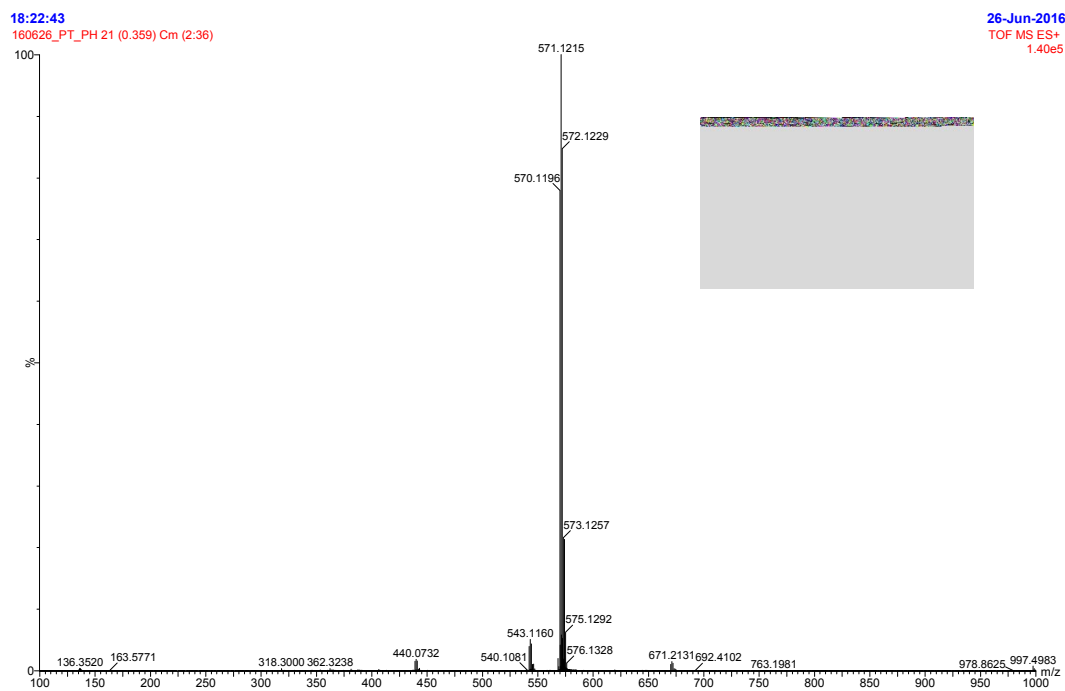

PtL-2: HRMS (ESI): 601.1312 [calcd for (M-CF<sub>3</sub>SO<sub>3</sub>)<sup>+</sup>: 601.1316].

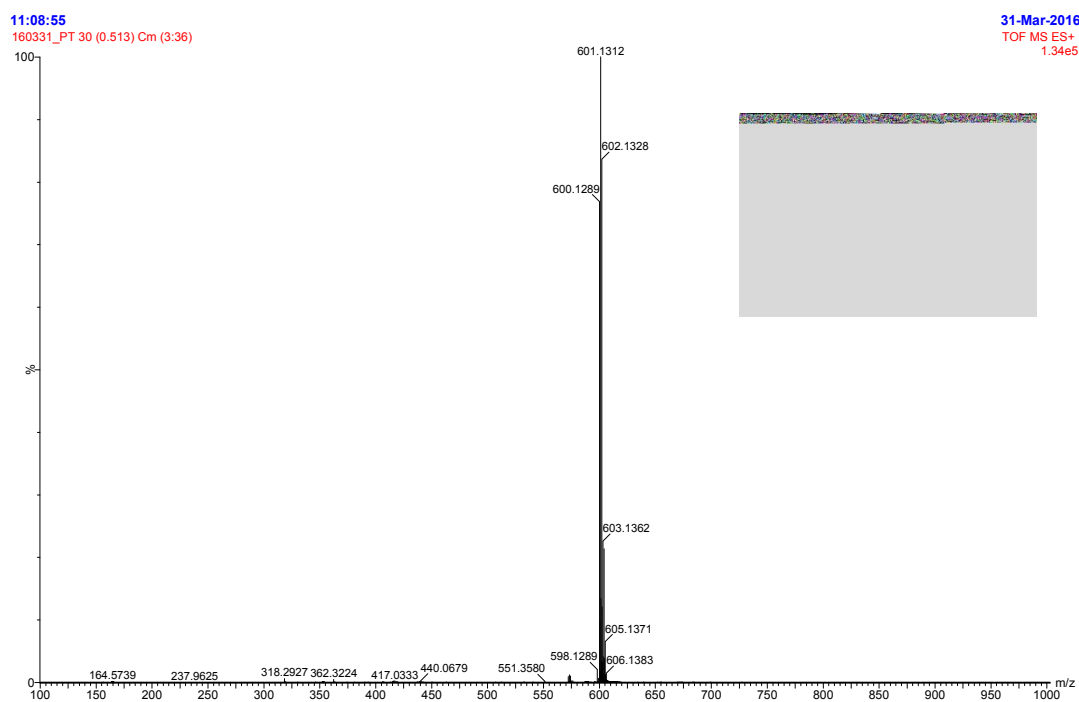

PtL-3: HRMS (ESI): 615.1465 [calcd for (M-CF<sub>3</sub>SO<sub>3</sub>)<sup>+</sup>: 615.1472].

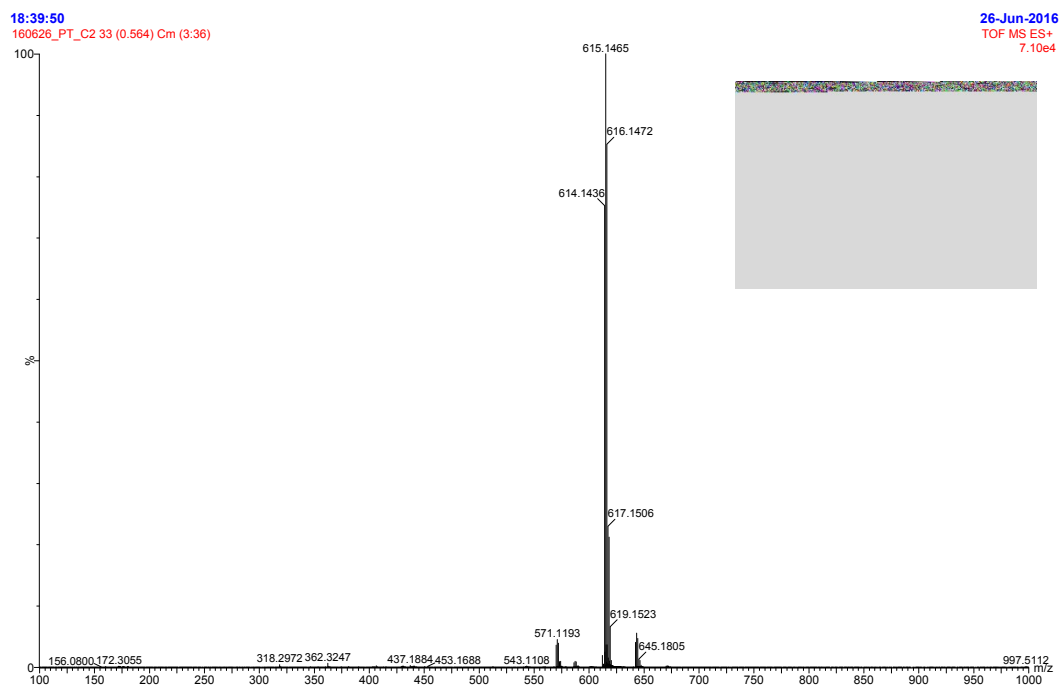

PtL-4: HRMS (ESI): 643.1792 [calcd for (M-CF<sub>3</sub>SO<sub>3</sub>)<sup>+</sup>: 643.1785].

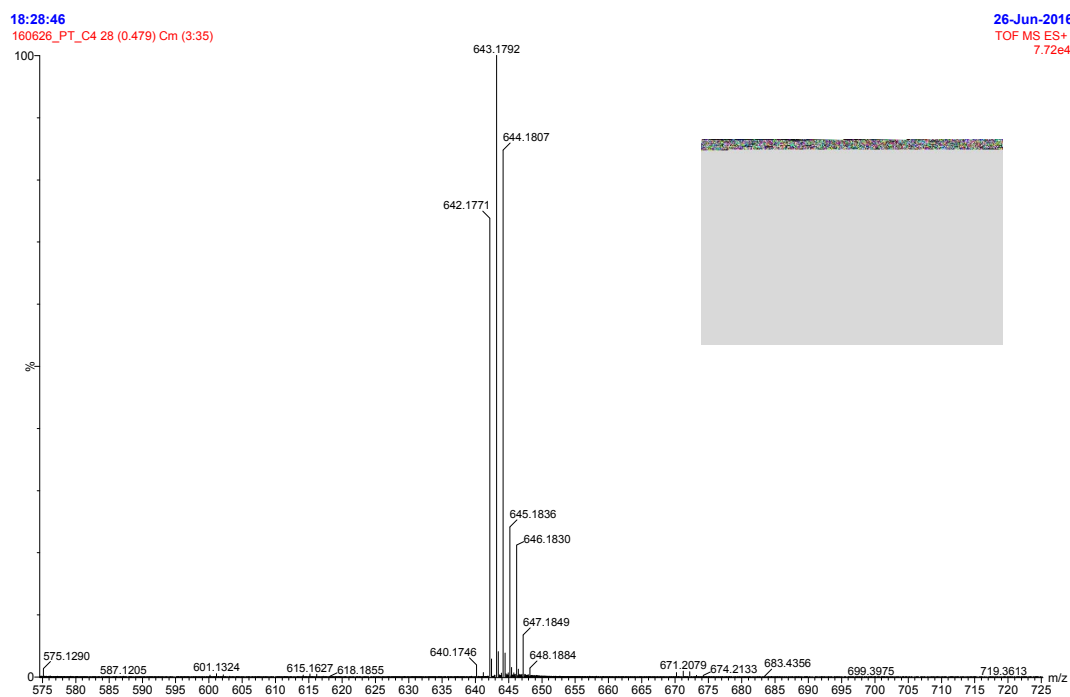

PtL-5: HRMS (ESI): 672.2101 [calcd for (M-CF<sub>3</sub>SO<sub>3</sub>)<sup>+</sup>: 671.2098].

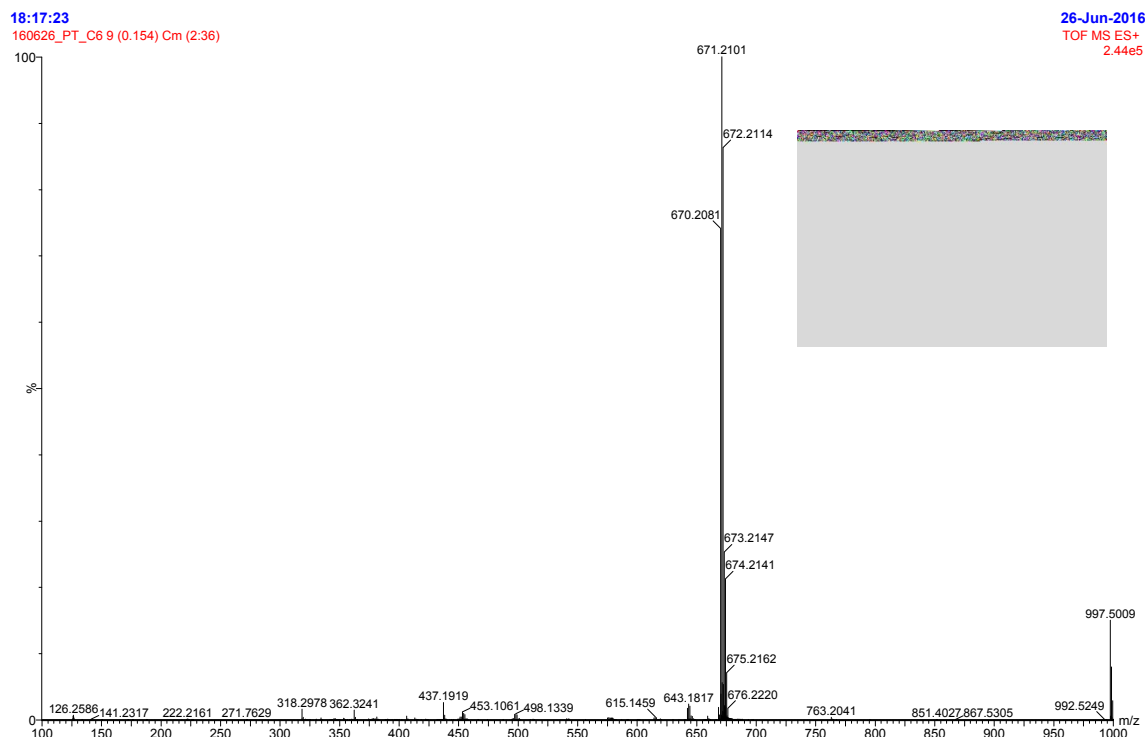

## 7 References

- [1] D. Demus, J. Goodby, G. W. Gray, H.-W. Spiess, V. Vill. Handbook of Liquid Crystals; Wiley-VCH: Weinheim, 1998; Vols. 1 - 3.
- [2] J.L. Serrano, Ed. Metallomesogens. Synthesis, Properties, and Applications; VCH: New York, 1996.
- [3] Sajoto, T.; Djurovich, P. I.; Tamayo, A. B.; Oxgaard, J.; Goddard, W. A.; Thompson, M. E. *J. Am. Chem. Soc.* 2009, 131, 9813 - 9822.
- [4] A. B. Tamayo, B. D. Alleyne, P. I. Jurovich, S. Lamansky, I. Tsyba, N. N. Ho, R. Bau, M. E. Thompson, *J. Am. Chem. Soc.* 2003, 125, 7377 - 7387.
- [5] E. Turner, N. Bakken, J. Li. *Inorg. Chem.* 2013, 52, 7344 - 7351.
- [6] Kolb, H. C.; Finn, M. G.; Sharpless, K. B. *Angew. Chem., Int. Ed.* 2001, 40, 2004 - 2021.
- [7] Finn, M. G.; Kolb, H. C.; Fokin, V. V.; Sharpless, K. B. *Prog. Chem.* 2008, 20, 1 - 4.
- [8] Kim, S. J.; Kang, S. H.; Park, K.-M.; Kim, H.; Zin, W.-C.; Choi, M.-G.; Kim, K. *Chem. Mater.* 1998, 10, 1889.
- [9] a) M.B. Smith and J. Michl. *Chem. Rev.* 2010, 110, 6891–6936; b) Takao Itoh. *Chem. Rev.* 2012, 112, 4541 - 4568.
- [10] M. Krikorian, S. Liu, and T. M. Swager. *J. Am. Chem. Soc.* 2014, 136, 2952 - 2955.
